1 **High frequency of Exon 20 S768I *EGFR* mutation detected**  
2 **in malignant pleural effusions: a poor prognosticator of**  
3 **NSCLC?**

4 George D'Souza<sup>1,2\*</sup>, Chirag Dhar<sup>1,2,3\*</sup>, Vishal Kyalanoor<sup>3</sup>, Lokendra Yadav<sup>3</sup>, Mugdha Sharmra<sup>1,4</sup>,  
5 Mohammad Nawaz S<sup>2</sup>, Sweta Srivastava<sup>3</sup>

6  
7 <sup>1</sup>St. John's Research Institute, Bangalore, India

8  
9 <sup>2</sup>Department of Pulmonary Medicine, St. John's Medical College and Hospital, Bangalore, India

10  
11 <sup>3</sup>School of Medicine, University of California, San Diego, La Jolla, U.S.A.

12  
13 <sup>4</sup>Department of Transfusion Medicine and Immunohaematology, St. John's Medical  
14 College and Hospital, Bangalore, India

15  
16 <sup>5</sup>Department of General Medicine, St. John's Medical College and Hospital, Bangalore, India

17  
18 \* Equal contribution of authors

19  
20 Corresponding authors: Dr. Sweta Srivastava- [sweta.s@stjohns.in](mailto:sweta.s@stjohns.in), Dr. George D'Souza-  
21 [george.dsouza@stjohns.in](mailto:george.dsouza@stjohns.in) and Dr. Chirag Dhar- [cdhar@ucsd.edu](mailto:cdhar@ucsd.edu)/  
22 [chirag@worldviewofmedicine.org](mailto:chirag@worldviewofmedicine.org)

## 23 **Abstract**

24 Lung cancer is the cause of a fourth of all cancer-related deaths. About a third of all lung  
25 adenocarcinoma tumours harbour mutations on exons 18, 19, 20 and 21 of the epidermal growth  
26 factor receptor (*EGFR*) gene. Detection of these mutations allows for targeted therapies in the  
27 form of *EGFR* Tyrosine kinase inhibitors. In our study, we utilized malignant pleural effusions  
28 (MPEs) as “liquid biopsies” to detect *EGFR* mutations when tissue biopsies were unavailable.  
29 We showed that a direct sequencing approach was likely to miss SNVs in MPEs. We then  
30 optimized an *EGFR* mutant-specific quantitative polymerase chain reaction-based assay and  
31 piloted it on n=10 pleural effusion samples (1 non-malignant pleural effusion as a negative  
32 control). 5/9 (55.55%) samples harboured *EGFR* mutations with 2/9 (22.22%) being exon 19  
33 deletions and 3/9 (33.33%) had the S768I exon 20 mutation. The frequency of the S768I SNV in  
34 our study was significantly higher than that observed in other studies (~0.3%). Utilizing publicly  
35 available cBioPortal data, we report that patients with the S768I SNV had a shorter median  
36 survival time, progression-free survival time and lower tumor mutation count compared to  
37 patients with other *EGFR* mutations. These data suggest that this point mutation predicts poor  
38 prognosis as a result of aggressive disease, though studies in larger cohorts are necessary to  
39 confirm these findings. The high frequency of S768I mutations seen in our study also suggests  
40 that cancer cells harbouring these mutations may be superior in their ability to migrate, home or  
41 reside in pleural fluid.

42

## 43 **Introduction**

44 Lung cancer is a major contributor to death due to cancer. Amongst the various types of  
45 lung cancer, non-small cell lung cancer (NSCLC) accounts for approximately 80% of all

46 cases(1). A significant rise has been seen in the time trends of lung cancer in the Indian cities of  
47 Delhi, Chennai and Bangalore. Lung cancer is the cause of 6.9 percent of all new cancer cases  
48 and 9.3 percent of all cancer related deaths in both men and women in India (2). Mutations seen  
49 on Exons 18, 19, 20 and 21 of the Epidermal growth factor receptor (*EGFR*) gene are frequently  
50 observed in these cases and have been shown to be present in nearly a third of all lung  
51 adenocarcinoma cases (3)(4)(5). *EGFR* is a family member of receptor tyrosine kinases that play  
52 a central role in cellular signalling promoting cell growth and proliferation. Some mutations in  
53 this protein strongly predict the efficacy of *EGFR* tyrosine kinase inhibitors used in the treatment  
54 of these cases. There are reportedly more than 32 different mutations that have been detected in  
55 this gene distributed across exons 18, 19, 20, and 21 (6)(7). More than 20 different in-frame  
56 deletions on exon 19 have been reported accounting for nearly half of the cases of *EGFR* mutant  
57 lung adenocarcinoma. Importantly, tumours harbouring these deletions are found to be sensitive  
58 to *EGFR* TKIs such as erlotinib and gefitinib (8). This targeted therapy has been found to  
59 increase clinical outcomes in these patients (9). Response rates of more than 70 percent have  
60 been observed in patients on *EGFR* targeted therapy (10). Patients with *EGFR* mutant positive  
61 advanced NSCLC treated with Erlotinib, an *EGFR* Tyrosine kinase inhibitor (TKI) have shown  
62 better response rates and Progression-free survival (PFS) as compared to those on first line  
63 chemotherapeutic agents (11)(12)(13)(14).

64 Diagnostic tests for the detection of these *EGFR* mutations are now part of the routine  
65 management of lung adenocarcinoma(15). In spite of the invasiveness and morbidity associated  
66 with lung biopsies(16), the primary tumour is preferred for detection of mutations(17). Most  
67 often, an amplification-refractory mutation system (ARMS) is used for the detection of these  
68 mutations from the biopsy. The utility of malignant pleural effusion (MPE) in the detection of

69 EGFR mutations has been well established over the years in the field of lung cancer  
 70 diagnosis(18). In this study, we optimized a method to detect EGFR mutations in MPEs at our  
 71 tertiary care centre. Notably, the single nucleotide variant (SNV) S768I was found in 3 out of the  
 72 9 pleural effusions (33.33%). We then analysed the prevalence and clinical features of patients  
 73 harboring this SNV by utilizing cBioPortal ([www.cbioportal.org](http://www.cbioportal.org)).

74

## 75 Results

### 76 Dilutions of mutant in wildtype EGFR DNA predict poor sensitivity of direct sequencing- 77 based detection of SNVs in MPEs.

78 First, a direct sequencing-based approach was optimized to detect EGFR mutations from  
 79 MPEs. A common exon 19 deletion was detected using this method (figure 1 a and b). We then  
 80 asked if this method would be suitable to pick up mutant alleles in the backdrop of wildtype  
 81 inflammatory cells present in MPEs. To answer this question, we serially diluted DNA with the  
 82 exon 19 deletion with wildtype DNA and subjected the mixture to direct sequencing. While  
 83 signatures of the large 18bp deletion were visible even in 1:100 dilutions, the results suggested  
 84 poor base-call confidence (figure 1 c). This result suggested that the direct sequencing method  
 85 was unlikely to pick up SNVs.

86

87 **Figure 1: Poor base-call**  
 88 **confidence in diluted DNA**  
 89 **samples. a) Common exon 19**  
 90 **deletion detected.** Alignment of  
 91 MPE sequence with reference

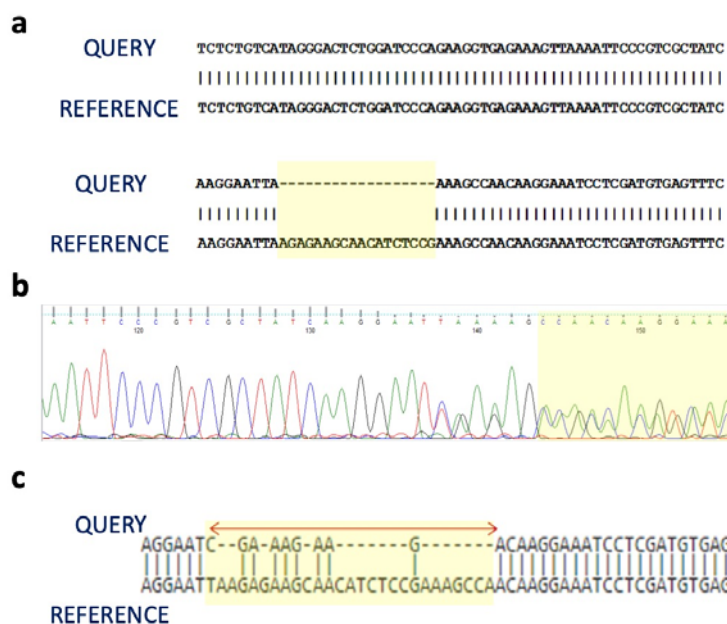

92 sequence shows an 18bp deletion (highlighted in the yellow box). **b) Chromatogram view of**  
93 **the same mutation** (highlighted in the yellow box) **c) Alignment of diluted DNA sample.** Poor  
94 base-call confidence in sequence of 1:100 dilution of mutant DNA in wildtype DNA (healthy  
95 laboratory volunteer).

96 **High frequency of S768I exon 20 mutation detected by mutant-specific quantitative PCR of**  
97 **MPE.**

98 Subsequently, an established *EGFR* mutation real-time PCR kit was used to identify  
99 *EGFR* mutations in malignant pleural effusions. While this kit is optimized to detect mutations in  
100 genomic DNA obtained from primary tumors, we attempted to utilize MPEs instead. We  
101 demonstrated for the first time that this kit could detect *EGFR* mutations from MPEs. Our results  
102 showed that 5/9 (55.55%) of pleural effusions probed had *EGFR* mutations. Of these, 2/9  
103 (22.22%) were the exon 19 deletion E746\_S750del18 and 3/9 (33.33%) were the exon 20 S768I  
104 mutations (Figure 2 a and b). The amplification plots and  $\Delta C_t$  values are provided in  
105 supplementary figures 1-7 and supplementary tables 1 and 2. The occurrence of this SNV and  
106 clinical features of these patients was then studied using publicly available data on cBioPortal.  
107 This SNV has been detected only 17 times in the nearly 5836 (0.3%) non-small cell lung cancer  
108 samples surveyed for *EGFR* mutations (Figure 2 c). These detections include duplicates and the  
109 frequency at the patient level is 0.18% (10/5490 patients). This SNV is mapped onto the  
110 tyrosine-kinase domain of *EGFR* and is a known cancer hotspot (statistically significantly  
111 recurrent mutations identified from large scale cancer genomic studies) (Figure 2 d). Patients  
112 with this mutation are suitable candidates for the FDA-approved targeted therapy Afatanib.

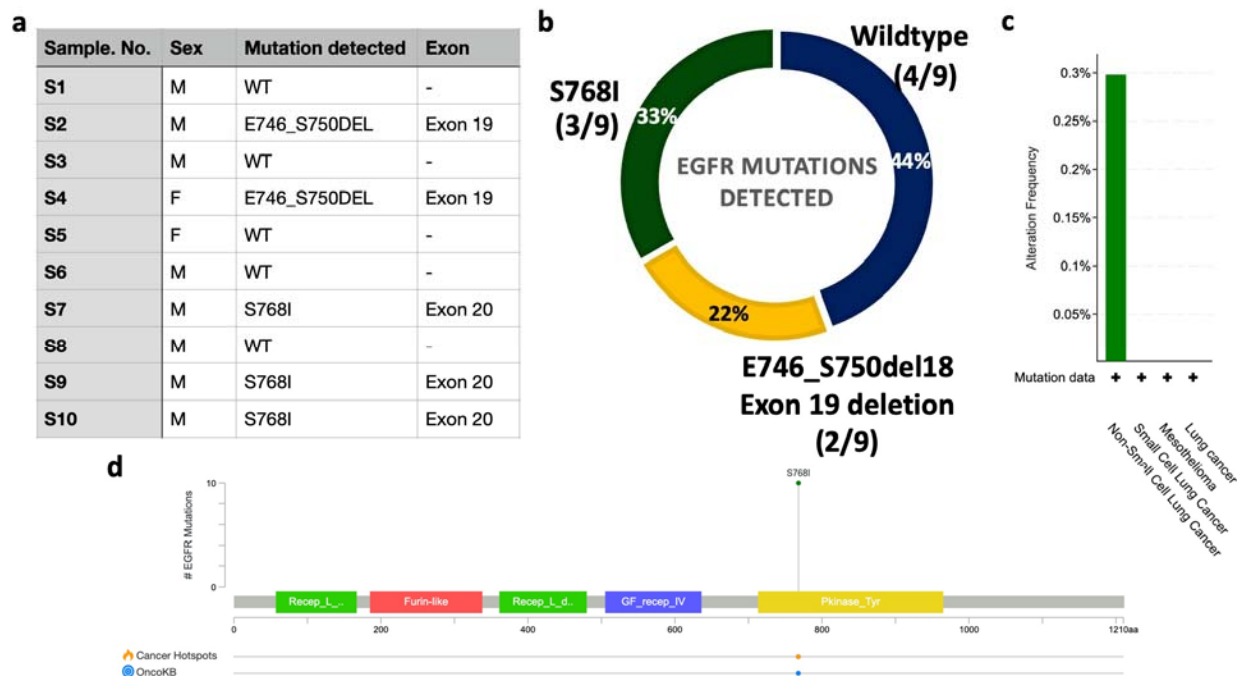

113  
 114 **Figure 2: High frequency of S768I detected from MPEs. a) Table depicting gender,**  
 115 **mutation detected and exon of occurrence. M= Male, F= Female, WT= wildtype *EGFR*, S5**  
 116 **was a non-malignant pleural fluid sample that served as an internal assay negative control b)**  
 117 **Doughnut chart representing the frequency of various mutations detected in this study.**  
 118 **Percentages are embedded in the slices and number of cases observed are indicated in**  
 119 **parenthesis beneath the genotype. c) Frequency of S768I in other studies. cBioPortal data**  
 120 **shows that this SNV has been detected only 17 times at a frequency of 0.4%. d) Mapping of**  
 121 **S768I. S768I maps to the tyrosine kinase domain of *EGFR* and is a known cancer hotspot.**

122  
 123  
 124  
 125

126 **Patients having the S768I mutation have a shorter median survival time and a shorter**  
 127 **progression-free survival time compared to patients having other *EGFR* mutations.**

128 From publicly available cBioPortal data, patients with the S768I mutation have a median  
 129 survival of 6.20 months compared to 38.40 months patients with other *EGFR* mutations (figure 3  
 130 a, b and c). Additionally, patients with the SNV had a shorter progression-free survival times  
 131 (8.55 months for patients with S768I vs 44.02 months for patients with other *EGFR* mutations,  
 132 figures 4 a, b and c). These survival statistics (limited by number of patients) suggest that  
 133 patients with this SNV present with an advanced form of NSCLC.

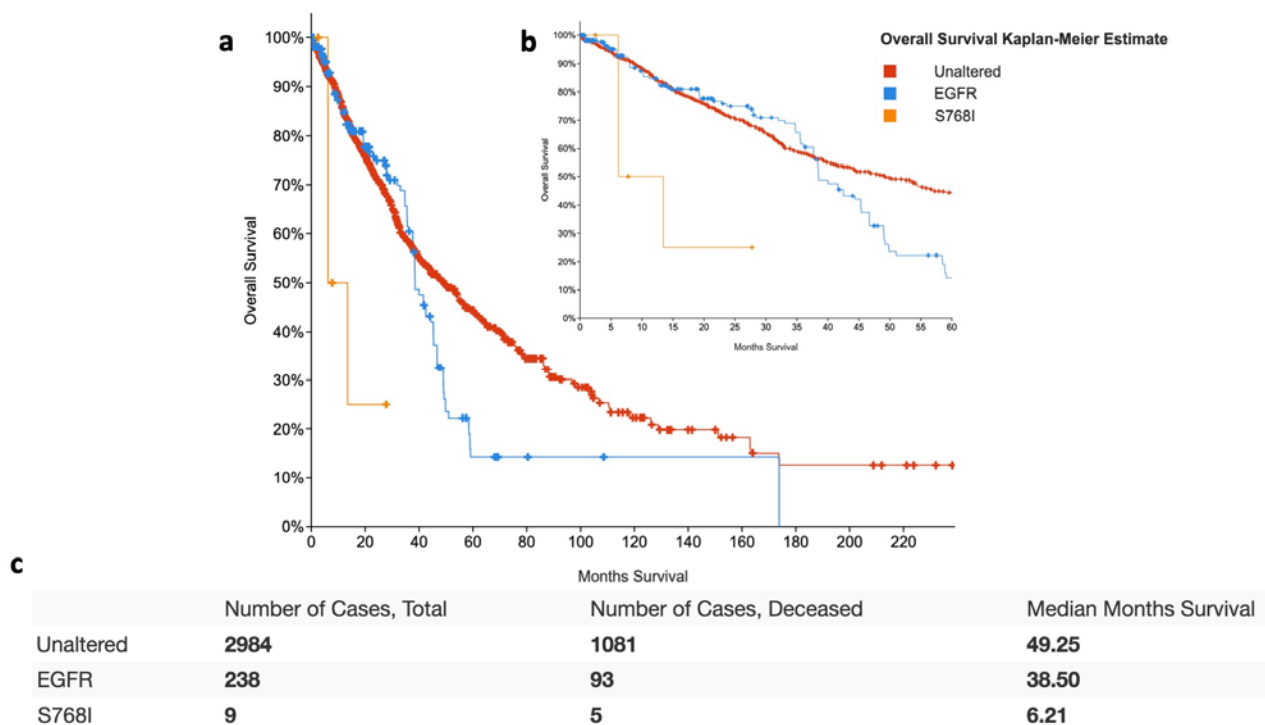

134 **Figure 3: Patients having the S768I mutation have a shorter median survival time**  
 135 **compared to patients having other *EGFR* mutations. a) Kaplan-Meier (KM) survival curve**  
 136 **b) KM curve for first 60 months inset c) Median survival in months suggest shorter median**  
 137 **survival in patients with S768I. Unaltered refers to NSCLC patients without *EGFR* mutations,**  
 138 **EGFR to patients with *EGFR* mutations except S768I and S768I refers to patients with this SNV.**

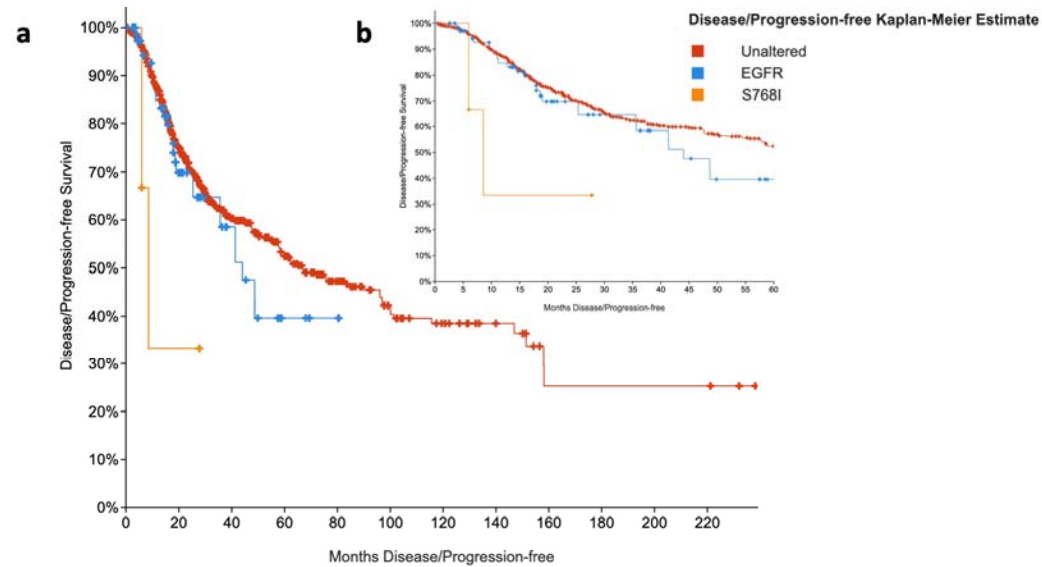

140  
141 **Figure 4: Patients having the S768I mutation have a shorter progression-free survival time**

142 **compared to patients having other EGFR mutations. a) Kaplan-Meier (KM) survival curve**

143 **b) KM curve for first 60 months inset c) Median survival in months suggest shorter median**

144 **time to relapse in patients with S768I. Unaltered refers to NSCLC patients without EGFR**

145 **mutations, EGFR to patients with EGFR mutations except S768I and S768I refers to patients**

146 **with this SNV.**

147

148 **Presence of the S768I SNV was not associated with a significant difference in stage at**

149 **diagnosis, lymph node involvement, size of tumor and metastasis.**

150 Given the poorer survival in the S768I group, we compared the stage at diagnosis, lymph nodal

151 involvement, size of tumor and metastasis between the groups. There was no difference in the

152 stage at diagnosis between patients with or without the S768I mutation (figure 5 a). There also

153 was no discernible difference in lymph nodal involvement (figure 5 b) or tumor size (figure 5 c)



154 between the two groups possibly due to the small sample size in the S768I group. We then  
 155 queried the number metastasis samples obtained from these patients as a proxy for frequency of  
 156 metastasis. Again, there was no difference in the frequency between the groups (figure 5 d). It is  
 157 likely that a larger meta-analysis of this SNV may reveal discernible differences in these factors  
 158 but in a limited number of cases with available data this was not the case.

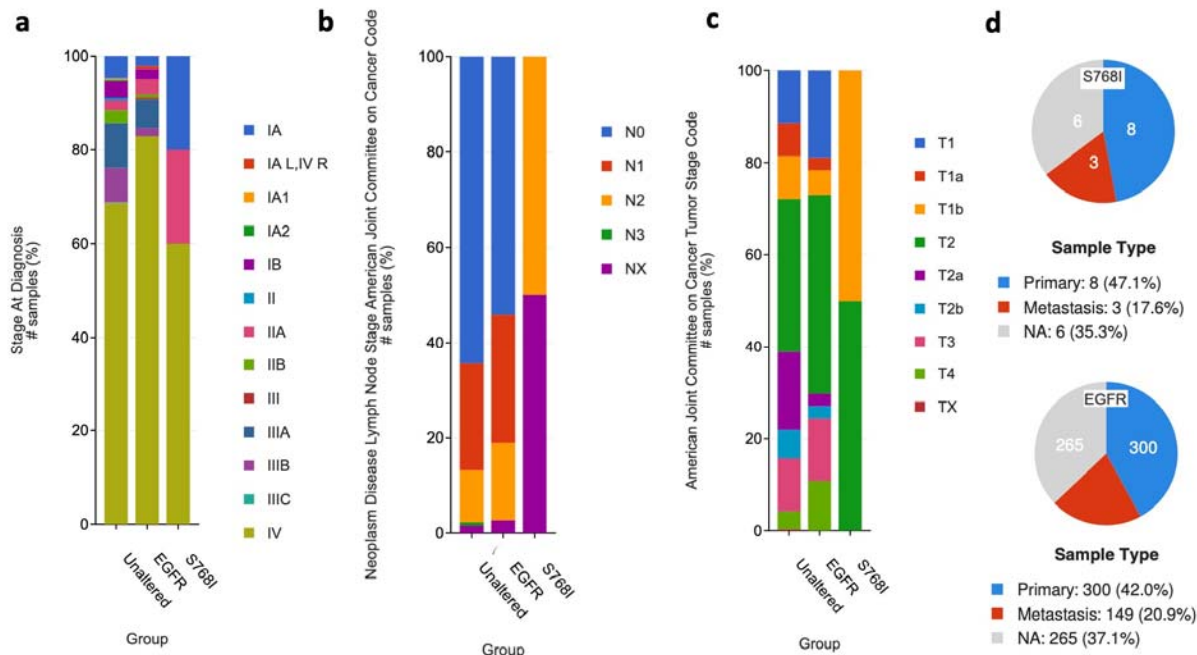

159  
 160 **Figure 5: No observable differences in stage at diagnosis, lymph nodal involvement, tumor**  
 161 **stage code or metastasis in tumors with S768I. Differences between groups by a) Stage at**  
 162 **diagnosis b) Lymph nodal involvement c) Tumor stage code and d) metastatic lesions**  
 163 **sampled as a proxy for metastatic frequency.** Unaltered refers to NSCLC patients without  
 164 *EGFR* mutations, EGFR to patients with *EGFR* mutations except S768I and S768I refers to  
 165 patients with this SNV.

166  
 167

168 **Tumors with the S768I SNV have a lower mutation burden but co-occur with mutations on**  
 169 **other genes.**

170 We then asked if patients with the S768I patients had a lower mutation count compared  
 171 to patients with other *EGFR* mutations. Indeed, the number of mutations was lower in the S768I  
 172 group (figure 6 a) suggesting a more deleterious effect of this SNV. These data when taken  
 173 together with the survival data point towards a likely pathogenic role of S768I in advanced  
 174 NSCLC. Further analysis revealed association of the S768I SNV with other mutations. This SNV  
 175 was as likely to co-occur with TP53 mutations as tumors with no EGFR mutations or ones with  
 176 other EGFR mutations. Yet, S768I co-occurred with mutations on other genes such as MUC17,  
 177 BMPR2, DOCK3, TPTE, ATRX and FSHR (figure 6 b, c and d). The clinical significance or  
 178 mechanistic importance of these co-occurring mutations is unknown.

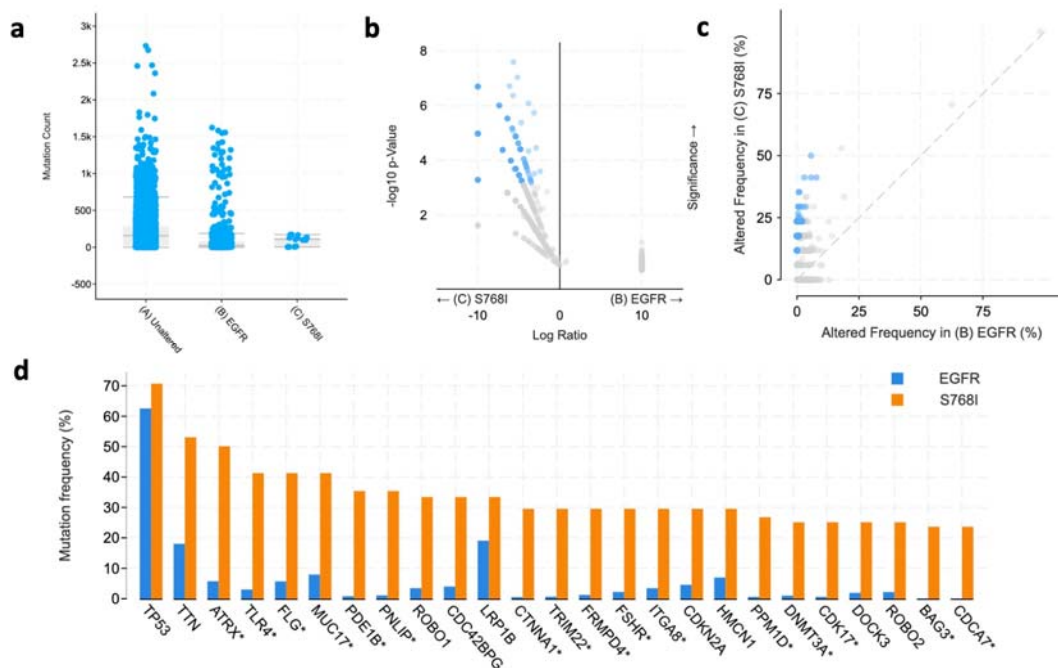

179  
 180 **Figure 6: Lower tumor mutation in patients with S768I and co-occurrence with other**  
 181 **mutations. a) Mutation load in tumors with S768I.** The overall mutation load in tumors with  
 182 the S768I SNV is lower than in tumors with other EGFR mutations or NSCLC samples with

183 other mutations. **b) Graphical representation of genes mutated more frequently in tumors**  
184 **positive for S768I but not in tumors with other EGFR mutations.** **c) Dot plot depicting**  
185 **frequency of co-occurring mutations in S768I tumors.** Blue dots represent genes with a  
186 statistically significant p-value. **d) Bar graphs of 25 most frequently detected mutations**  
187 **(apart from EGFR).** TP53 mutation frequency is nearly the same but mutations in genes such as  
188 FLG, MUC17, BMP2, DOCK3, TPTE, ATRX and FSHR mutations appear more frequently in  
189 conjunction with the S768I mutation. Asterisk (\*) genes represent those with statically  
190 significant differences. A list of all 175 genes with statistically significant co-occurrence with  
191 S768I are listed in the supplementary information.

192

## 193 **Discussion**

194 In this study, we showed that a direct sequencing approach may miss *EGFR* SNVs in  
195 MPEs and therefore utilized a Taqman-based mutant-specific quantitative PCR assay. We  
196 optimized this assay and detected both large deletions and SNVs in *EGFR*. Notably, a high  
197 frequency of the S768I mutation occurring in the absence of other *EGFR* mutations was seen.  
198 We then compared this frequency to publicly available data on cBioPortal<sup>®</sup> and observed a  
199 significant difference in frequency (33.33% in our study vs 0.4% in reported literature). To  
200 further understand the role of this SNV, a cBioPortal<sup>®</sup> search and comparison strategy was  
201 devised to compare the clinical features of patients with the SNV, patients with other *EGFR*  
202 mutations and patients with no mutations in *EGFR*. Patients with the S768I had an 84% reduction  
203 in estimated median survival time (and progression-free survival time) compared to those with  
204 other *EGFR* mutations. Tumors bearing the S768I mutation also had a lower mutational than the  
205 other *EGFR* mutations group. These data when taken together suggests that patients with the

206 S768I mutation have poorer clinical outcomes and this mutation is likely to promote an  
207 aggressive tumor phenotype.

208

209       Very little is known about the implications of having the S768I mutation in the absence  
210 of other *EGFR* mutations. OncoKB suggests the use of afatinib as the FDA-approved therapy for  
211 patients with this SNV. One other study shown that S768I conferred reduced sensitivity to  
212 gefitinib *in vitro* as compared to other mutations (19)(20). A study by Leventakos and group  
213 reported that the S768I is rare and is usually found in combination with sensitizing mutations  
214 and they have concluded that the predictive and prognostic role of this mutation is yet to be fully  
215 explored (21). In our study we have found that 33.3% of the samples exhibited this mutation in  
216 isolation, with an absence of any other mutation. It did not escape our attention that all reports of  
217 this SNV in studies discussed here occur in the presence of other EGFR mutations (such as at the  
218 G719 or T790 position). Some of the reasons for this mutation being detected in the absence of  
219 other *EGFR* mutations in our study are discussed here. Most studies utilize the primary tissue  
220 and a sub-population with this isolated mutation may appear later in the pathogenesis of the  
221 disease. One may also simply come to the conclusion that our cohort has a larger number of  
222 patients with this mutation, but we think otherwise. We hypothesize that S768I is a secondary  
223 mutation that develops later in the course of the disease and cells harbouring this mutation are  
224 able to migrate to, home in or reside within the pleural cavity more easily than cells without this  
225 mutation. One could further this speculation that cells having this mutation have a greater  
226 metastatic potential (figure 7) though further studies will be needed to prove these hypotheses.  
227 Additionally, *in vitro* and *in vivo* studies will determine if this mutation is likely to respond to  
228 EGFR TKIs such as afatinib.

229

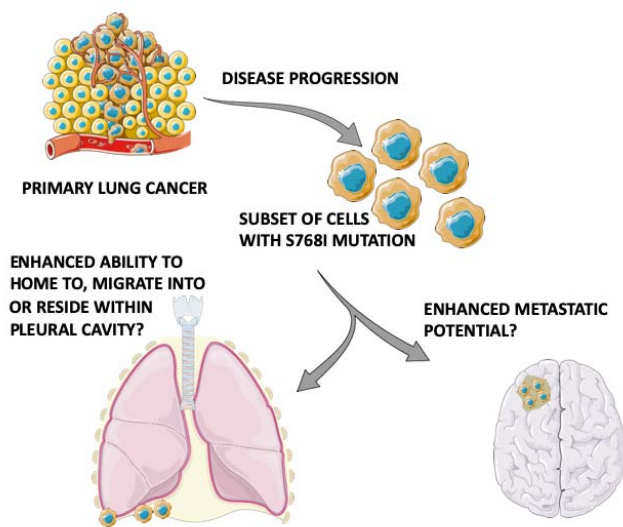

**Figure 7:** Hypothesized role of the S768I mutation in the pathogenesis of metastasis in lung cancer (Elements of images sourced from <http://smart.servier.com/>).

238

239 The prevalence of somatic mutations in the *EGFR* gene is high (~ 33%) in lung  
240 adenocarcinomas(22)(23). The detection of any *EGFR* mutation and the resultant treatment with  
241 targeted therapy with EGFR TKIs (Tyrosine Kinase Inhibitors) aid in sensitizing these tumours.  
242 *EGFR* mutation testing on tissue biopsies is the gold standard for diagnosis. However, biopsy  
243 procedures may result in uncontrolled bleeding and morbidity(24). Utility of pleural effusion  
244 fluid for mutation testing along with other secondary specimens (pericardial effusion, fine needle  
245 aspirates, CSF, cfDNA, etc) have been used as alternate strategies for reliable testing (25). In our  
246 study we first used PCR coupled to direct sequencing to detect mutation in pleural effusion  
247 derived malignant cells. We were able to detect a common 18bp deletion mutation using this  
248 method. One of the biggest drawbacks of direct sequencing versus allele specific detection lies in  
249 its limit of detection. Pleural fluid consists of a heterogeneous pool of stromal and inflammatory  
250 cells apart from the metastatic cells. Since the non-tumor cells harbour wildtype genomic  
251 sequence, the signal to noise ratio in electropherogram is lower for mutated sequence. The

252 mutation sequence identification may be compromised in the event of suboptimal malignant cells  
253 numbers. We showed that at dilution of 1:100 of a mutated DNA with wildtype genomic DNA  
254 signatures of the mutation are visible but the wildtype sequence bases provide conflicting results  
255 in certain positions of the gene. These inadequate results are more likely to be seen in single base  
256 pair mutations. We then utilized an *EGFR* mutation detection kit. This diagnostic kit is designed  
257 to test for *EGFR* mutation on FFPE sections but we were able to optimize its use on MPEs. To  
258 the best of our knowledge, this is the first report of MPE *EGFR* mutation testing in India  
259 utilizing the Taqman technology platform. Jong Sik Lee and colleagues have used PNA  
260 clamping technology to detect EGFR mutations in the supernatant derived from the pleural  
261 effusion where in the objective was to detect mutations using cell free DNA (26). Jie Lin et al  
262 have shown that EGFR mutations can be detected in the supernatant, cell pellets of the pleural  
263 effusion using High Resolution Melting (HRM) analysis and Sanger sequencing (27). When  
264 implemented on a small pilot scale study (n=9), we were successful in detecting EGFR mutations  
265 in 5/9 (55%) subjects. The mutations that were detected in these samples were either S768I or  
266 E746\_S750del.

267  
268 The need to develop minimally invasive diagnostic tests in the management of cancers is  
269 gaining momentum. However, our study is limited in its impact as it evaluates only 11 patients  
270 and further study needs to be undertaken to evaluate and validate this method in a larger cohort.  
271 Additionally, the detection of circulating tumour DNA should also be explored as an alternative  
272 to repeated biopsies is one of the techniques being studied (28). This detection is being done  
273 using highly sensitive techniques such as droplet digital polymerase chain reaction. Resources

274 must be directed towards the development of such minimally/non-invasive techniques, especially  
275 if these are inexpensive as well.

276

## 277 **Ethics**

278 Ethical clearance was obtained from the Institutional Ethics Committee of St. John's  
279 National Academy of Health as per IERB guidelines (Study No. 1/2016). Appropriate consents  
280 for carrying out experimental genetic tests were obtained.

281

## 282 **Methods**

283

### 284 **Pleural fluid processing and DNA isolation**

285 Pleural fluid was tapped from patients with malignant pleural effusions and centrifuged at  
286 3500 rpm for 5 mins at 4°C to collect the cell pellet. The cell pellets were stored in -80°C until  
287 further processing. The DNA was extracted from the samples using the QIAamp DNA Mini Kit  
288 (Qiagen) as per the manufacturer's instructions. Samples were analyzed for their quality using  
289 BioSpec Nano UV-VIS Spectrophotometer (Shimadzu Corp.) and electrophoresed on an agarose  
290 gel to ascertain integrity.

291

### 292 **Direct sequencing**

293 Appropriate primers for exons 18, 19, 20 and 21 of the EGFR gene were designed and  
294 obtained based on the reference sequence available on NCBI (Supplementary table 2). Genomic  
295 DNA obtained was subjected to a gradient PCR to optimize the annealing temperature and was

296 visualized on a 1.2% agarose gel (Supplementary figure 8). The PCR products were subjected to  
297 direct sequencing.

298

### 299 **Real-time PCR based detection of EGFR mutations**

300 DNA samples were subjected to an assay to detect 10 *EGFR* mutations in a 96-well  
301 Real Time PCR format using the TRUPCR® EGFR Kit (3B BlackBio Biotech India Ltd.) as per  
302 the manufacturer's instructions. Real-time PCR data analysis and identification of EGFR mutant  
303 samples was done. To the best of our knowledge, this is the first time this kit is being used to  
304 detect mutations from MPEs.

305

### 306 **cBioPortal search strategy**

307 A search strategy was used to access publicly available cancer genomic/clinical data on  
308 cBioPortal(29)(30) utilizing multiple studies(31)(32)(33)(34)(35)(36)(37)(38)(39)(40)(41)(42)  
309 with the gene alias “EGFR: MUT = S768I”, “EGFR” and to access all NSCLC studies. Venn-  
310 diagram based sorting was utilized to isolate cases with the S768I mutation and those with other  
311 *EGFR* mutations. “Unaltered” refers to patients with mutations other than EGFR, “EGFR” refers  
312 to patients with *EGFR* mutations other than S768I and “S768I” refers to patients with the S768I  
313 *EGFR* mutation. OncoKB(43) was used to identify any FDA-approved drug for this mutation.

314

### 315 **Acknowledgements**

316 This work is supported by a grant from the Advanced Research Wing of the Rajiv Gandhi  
317 University of Health Sciences, Bangalore. C.D. was awarded a C.R.E.S.T MAS scholarship by  
318 CTRI at the School of Medicine, University of California, San Diego. We thank Prof. Sudhir



319 Krishna, Ms. Pranatharathi Annapurna and the sequencing division of NCBS, Bangalore for their  
320 support. Some of these data were presented at the National Lung Cancer Conference 2016 in  
321 Bhubaneswar and at the American Society for Cellular Biology-European Molecular Biology  
322 Organization joint conference 2018 at San Diego(44)(45)(46) . A special mention to Dr. Paul  
323 Kalanithi for his battle against EGFR mutant lung cancer. His memoir When Breath becomes Air  
324 is humbling and yet, inspiring.

325

### 326 **Conflict of Interest**

327 The authors declare no conflict of interest.

328

### 329 **Author contributions**

330 G.D.S and C.D contributed equally this work which was conceived, planned, supervised  
331 and interpreted by G.D.S, C.D and S.S. Funding acquisition was by G.D.S. Experimental assays  
332 were performed and interpreted by C.D., V.K., L.Y. and M.S. Clinical sample acquisition was by  
333 C.D., M.N.S. and G.D.S. C.D. performed cBioPortal/bioinformatic analysis. Manuscript was  
334 written and edited by C.D. and V.K. S.S. edited the manuscript. All authors approved the final  
335 manuscript.

336

### 337 **References**

- 338 1. Detection and comparison of epidermal growth factor receptor mutations in cells and fluid  
339 of malignant pleural effusion in non-small cell lung cancer.
- 340 2. Malik PS, Raina V. Lung cancer: prevalent trends & emerging concepts. Indian J Med Res.  
341 2015 Jan;141(1):5–7.
- 342 3. Doval D, Prabhash K, Patil S, Chaturvedi H, Goswami C, Vaid A, et al. Clinical and  
343 epidemiological study of EGFR mutations and EML4-ALK fusion genes among Indian  
344 patients with adenocarcinoma of the lung. OncoTargets Ther. 2015;8:117–23.

- 345 4. Ding L, Getz G, Wheeler DA, Mardis ER, McLellan MD, Cibulskis K, et al. Somatic  
346 mutations affect key pathways in lung adenocarcinoma. *Nature*. 2008 Oct  
347 23;455(7216):1069–75.
- 348 5. Pao W, Miller V, Zakowski M, Doherty J, Politi K, Sarkaria I, et al. EGF receptor gene  
349 mutations are common in lung cancers from “never smokers” and are associated with  
350 sensitivity of tumors to gefitinib and erlotinib. *Proc Natl Acad Sci U S A*. 2004 Sep  
351 7;101(36):13306–11.
- 352 6. Sharma SV, Bell DW, Settleman J, Haber DA. Epidermal growth factor receptor mutations  
353 in lung cancer. *Nat Rev Cancer*. 2007 Mar;7(3):169–81.
- 354 7. Cosmic. COSMIC - Catalogue of Somatic Mutations in Cancer [Internet]. [cited 2020 Mar  
355 6]. Available from: <https://cancer.sanger.ac.uk/cosmic>
- 356 8. Cheng L, Alexander RE, Maclennan GT, Cummings OW, Montironi R, Lopez-Beltran A,  
357 et al. Molecular pathology of lung cancer: key to personalized medicine. *Mod Pathol Off J*  
358 *U S Can Acad Pathol Inc*. 2012 Mar;25(3):347–69.
- 359 9. Rocha-Lima CM, Raez LE. Erlotinib (tarceva) for the treatment of non-small-cell lung  
360 cancer and pancreatic cancer. *P T Peer-Rev J Formul Manag*. 2009 Oct;34(10):554–64.
- 361 10. Mok TS, Wu Y-L, Thongprasert S, Yang C-H, Chu D-T, Saijo N, et al. Gefitinib or  
362 carboplatin-paclitaxel in pulmonary adenocarcinoma. *N Engl J Med*. 2009 Sep  
363 3;361(10):947–57.
- 364 11. Zhou C, Wu Y-L, Chen G, Feng J, Liu X-Q, Wang C, et al. Erlotinib versus chemotherapy  
365 as first-line treatment for patients with advanced EGFR mutation-positive non-small-cell  
366 lung cancer (OPTIMAL, CTONG-0802): a multicentre, open-label, randomised, phase 3  
367 study. *Lancet Oncol*. 2011 Aug;12(8):735–42.
- 368 12. Rosell R, Carcereny E, Gervais R, Vergnenegre A, Massuti B, Felip E, et al. Erlotinib  
369 versus standard chemotherapy as first-line treatment for European patients with advanced  
370 EGFR mutation-positive non-small-cell lung cancer (EURTAC): a multicentre, open-label,  
371 randomised phase 3 trial. *Lancet Oncol*. 2012 Mar;13(3):239–46.
- 372 13. Sequist LV, Martins RG, Spigel D, Grunberg SM, Spira A, Jänne PA, et al. First-line  
373 gefitinib in patients with advanced non-small-cell lung cancer harboring somatic EGFR  
374 mutations. *J Clin Oncol Off J Am Soc Clin Oncol*. 2008 May 20;26(15):2442–9.
- 375 14. Shigematsu H, Lin L, Takahashi T, Nomura M, Suzuki M, Wistuba II, et al. Clinical and  
376 biological features associated with epidermal growth factor receptor gene mutations in lung  
377 cancers. *J Natl Cancer Inst*. 2005 Mar 2;97(5):339–46.
- 378 15. Peters S, Adjei AA, Gridelli C, Reck M, Kerr K, Felip E, et al. Metastatic non-small-cell  
379 lung cancer (NSCLC): ESMO Clinical Practice Guidelines for diagnosis, treatment and  
380 follow-up. *Ann Oncol Off J Eur Soc Med Oncol*. 2012 Oct;23 Suppl 7:vii56-64.

- 381 16. Wiener RS, Schwartz LM, Woloshin S, Welch HG. Population-based risk for complications  
382 after transthoracic needle lung biopsy of a pulmonary nodule: an analysis of discharge  
383 records. *Ann Intern Med*. 2011 Aug 2;155(3):137–44.
- 384 17. Pirker R, Herth FJF, Kerr KM, Filipits M, Taron M, Gandara D, et al. Consensus for EGFR  
385 mutation testing in non-small cell lung cancer: results from a European workshop. *J Thorac  
386 Oncol Off Publ Int Assoc Study Lung Cancer*. 2010 Oct;5(10):1706–13.
- 387 18. Liu D, Lu Y, Hu Z, Wu N, Nie X, Xia Y, et al. Malignant Pleural Effusion Supernatants  
388 Are Substitutes for Metastatic Pleural Tumor Tissues in EGFR Mutation Test in Patients  
389 with Advanced Lung Adenocarcinoma. *PLoS ONE* [Internet]. 2014 Feb 28 [cited 2020 Apr  
390 3];9(2). Available from: <https://www.ncbi.nlm.nih.gov/pmc/articles/PMC3938554/>
- 391 19. Kancha RK, von Bubnoff N, Peschel C, Duyster J. Functional analysis of epidermal growth  
392 factor receptor (EGFR) mutations and potential implications for EGFR targeted therapy.  
393 *Clin Cancer Res Off J Am Assoc Cancer Res*. 2009 Jan 15;15(2):460–7.
- 394 20. Chen Y-R, Fu Y-N, Lin C-H, Yang S-T, Hu S-F, Chen Y-T, et al. Distinctive activation  
395 patterns in constitutively active and gefitinib-sensitive EGFR mutants. *Oncogene*. 2006 Feb  
396 23;25(8):1205–15.
- 397 21. Leventakos K, Kipp BR, Rumilla KM, Winters JL, Yi ES, Mansfield AS. S768I Mutation  
398 in EGFR in Patients with Lung Cancer. *J Thorac Oncol Off Publ Int Assoc Study Lung  
399 Cancer*. 2016;11(10):1798–801.
- 400 22. Zhang Y-L, Yuan J-Q, Wang K-F, Fu X-H, Han X-R, Threapleton D, et al. The prevalence  
401 of EGFR mutation in patients with non-small cell lung cancer: a systematic review and  
402 meta-analysis. *Oncotarget*. 2016 Oct 12;7(48):78985–93.
- 403 23. Han B, Tjulandin S, Hagiwara K, Normanno N, Wulandari L, Laktionov K, et al. EGFR  
404 mutation prevalence in Asia-Pacific and Russian patients with advanced NSCLC of  
405 adenocarcinoma and non-adenocarcinoma histology: The IGNITE study. *Lung Cancer  
406 Amst Neth*. 2017;113:37–44.
- 407 24. Lim M, Kim C-J, Sunkara V, Kim M-H, Cho Y-K. Liquid Biopsy in Lung Cancer: Clinical  
408 Applications of Circulating Biomarkers (CTCs and ctDNA). *Micromachines*. 2018 Feb  
409 28;9(3).
- 410 25. Ellison G, Zhu G, Moulis A, Dearden S, Speake G, McCormack R. EGFR mutation testing  
411 in lung cancer: a review of available methods and their use for analysis of tumour tissue and  
412 cytology samples. *J Clin Pathol*. 2013 Feb;66(2):79–89.
- 413 26. Lee JS, Hur JY, Kim IA, Kim HJ, Choi CM, Lee JC, et al. Liquid biopsy using the  
414 supernatant of a pleural effusion for EGFR genotyping in pulmonary adenocarcinoma  
415 patients: a comparison between cell-free DNA and extracellular vesicle-derived DNA.  
416 *BMC Cancer*. 2018 Dec 10;18(1):1236.

- 417 27. Lin J, Gu Y, Du R, Deng M, Lu Y, Ding Y. Detection of EGFR mutation in supernatant,  
418 cell pellets of pleural effusion and tumor tissues from non-small cell lung cancer patients by  
419 high resolution melting analysis and sequencing. *Int J Clin Exp Pathol*. 2014;7(12):8813–  
420 22.
- 421 28. Suraj S, Dhar C, Srivastava S. Circulating nucleic acids: An analysis of their occurrence in  
422 malignancies. *Biomed Rep*. 2017 Jan;6(1):8–14.
- 423 29. Cerami E, Gao J, Dogrusoz U, Gross BE, Sumer SO, Aksoy BA, et al. The cBio cancer  
424 genomics portal: an open platform for exploring multidimensional cancer genomics data.  
425 *Cancer Discov*. 2012 May;2(5):401–4.
- 426 30. Gao J, Aksoy BA, Dogrusoz U, Dresdner G, Gross B, Sumer SO, et al. Integrative analysis  
427 of complex cancer genomics and clinical profiles using the cBioPortal. *Sci Signal*. 2013  
428 Apr 2;6(269):pl1.
- 429 31. Thoracic PDX (MSK, provisional) [Internet]. Available from: [cBioPortal.org](https://cBioPortal.org)
- 430 32. Yaeger R, Chatila WK, Lipsyc MD, Hechtman JF, Cercek A, Sanchez-Vega F, et al.  
431 Clinical Sequencing Defines the Genomic Landscape of Metastatic Colorectal Cancer.  
432 *Cancer Cell*. 2018 08;33(1):125–136.e3.
- 433 33. Rizvi H, Sanchez-Vega F, La K, Chatila W, Jonsson P, Halpenny D, et al. Molecular  
434 Determinants of Response to Anti-Programmed Cell Death (PD)-1 and Anti-Programmed  
435 Death-Ligand 1 (PD-L1) Blockade in Patients With Non-Small-Cell Lung Cancer Profiled  
436 With Targeted Next-Generation Sequencing. *J Clin Oncol Off J Am Soc Clin Oncol*. 2018  
437 01;36(7):633–41.
- 438 34. Jamal-Hanjani M, Wilson GA, McGranahan N, Birkbak NJ, Watkins TBK, Veeriah S, et al.  
439 Tracking the Evolution of Non-Small-Cell Lung Cancer. *N Engl J Med*. 2017  
440 01;376(22):2109–21.
- 441 35. Gobbin E, Galetta D, Tiseo M, Graziano P, Rossi A, Bria E, et al. Molecular profiling in  
442 Italian patients with advanced non-small-cell lung cancer: An observational prospective  
443 study. *Lung Cancer Amst Neth*. 2017;111:30–7.
- 444 36. Rizvi NA, Hellmann MD, Snyder A, Kvistborg P, Makarov V, Havel JJ, et al. Cancer  
445 immunology. Mutational landscape determines sensitivity to PD-1 blockade in non-small  
446 cell lung cancer. *Science*. 2015 Apr 3;348(6230):124–8.
- 447 37. Campbell JD, Alexandrov A, Kim J, Wala J, Berger AH, Pedamallu CS, et al. Distinct  
448 patterns of somatic genome alterations in lung adenocarcinomas and squamous cell  
449 carcinomas. *Nat Genet*. 2016;48(6):607–16.
- 450 38. Imielinski M, Berger AH, Hammerman PS, Hernandez B, Pugh TJ, Hodis E, et al. Mapping  
451 the hallmarks of lung adenocarcinoma with massively parallel sequencing. *Cell*. 2012 Sep  
452 14;150(6):1107–20.

- 453 39. Lung Adenocarcinoma, Lung Squamous Cell Carcinoma (TCGA, Firehose Legacy)  
454 [Internet]. Available from: cBioPortal.org
- 455 40. Cancer Genome Atlas Research Network. Comprehensive molecular profiling of lung  
456 adenocarcinoma. *Nature*. 2014 Jul 31;511(7511):543–50.
- 457 41. TCGA PanCancer Atlas [Internet]. TCGA PanCancer Atlas. Available from:  
458 <https://www.cell.com/pbassets/consortium/pancanceratlas/pancani3/index.html>
- 459 42. Jordan EJ, Kim HR, Arcila ME, Barron D, Chakravarty D, Gao J, et al. Prospective  
460 Comprehensive Molecular Characterization of Lung Adenocarcinomas for Efficient Patient  
461 Matching to Approved and Emerging Therapies. *Cancer Discov*. 2017;7(6):596–609.
- 462 43. Chakravarty D, Gao J, Phillips SM, Kundra R, Zhang H, Wang J, et al. OncoKB: A  
463 Precision Oncology Knowledge Base. *JCO Precis Oncol* [Internet]. 2017 Jul [cited 2020  
464 Apr 3];2017. Available from: <https://www.ncbi.nlm.nih.gov/pmc/articles/PMC5586540/>
- 465 44. Dhar C, Sharma M, Nawaz M, D'Souza G, Srivastava S. Sanger sequencing of metastatic  
466 pleural effusion: An inexpensive, minimally invasive tool for the detection of EGFR  
467 mutations in lung adenocarcinoma- Presented at the National Lung Cancer Conference,  
468 Bhubaneswar 2016  
469 ([https://www.researchgate.net/publication/313108485\\_Sanger\\_sequencing\\_of\\_metastatic\\_pleural\\_effusion\\_An\\_inexpensive\\_minimally\\_invasive\\_tool\\_for\\_the\\_detection\\_of\\_EGFR\\_mutations\\_in\\_lung\\_adenocarcinoma-Presented\\_at\\_the\\_National\\_Lung\\_Cancer\\_Conference\\_2016](https://www.researchgate.net/publication/313108485_Sanger_sequencing_of_metastatic_pleural_effusion_An_inexpensive_minimally_invasive_tool_for_the_detection_of_EGFR_mutations_in_lung_adenocarcinoma-Presented_at_the_National_Lung_Cancer_Conference_2016)). In.
- 473 45. Dhar C, Sharma M, Nawaz S M et al. Detection of EGFR TKI sensitizing mutations from  
474 metastatic pleural fluid secondary to lung adenocarcinoma: a perspective from Southern  
475 India. [version 1; not peer reviewed]. *F1000Research* 2018, 7:1943 (poster)  
476 (<https://doi.org/10.7490/f1000research.1116357.1>). In.
- 477 46. 2018 ASCB Annual Meeting abstracts. *Mol Biol Cell*. 2018 Dec 15;29(26):3063.
- 478
- 479
- 480
- 481
- 482
- 483
- 484
- 485

486

487

488

489

490 **Supplementary Information**

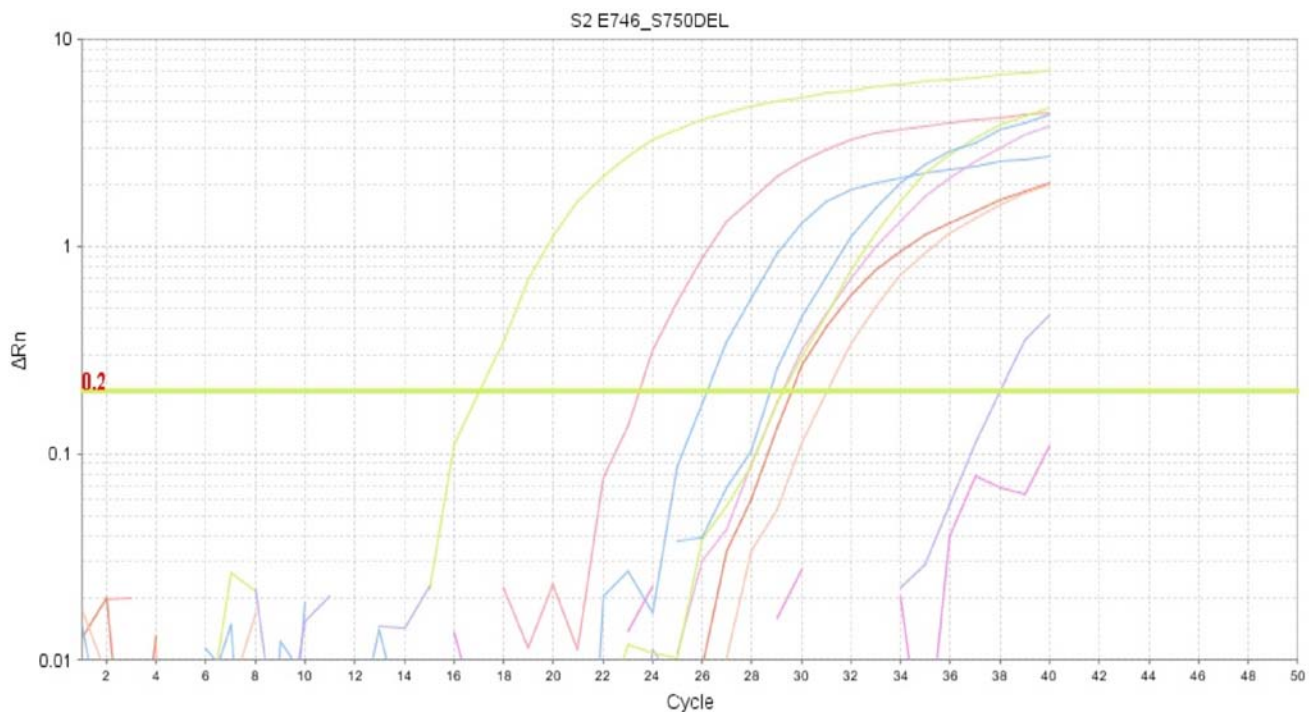

Supplemental figure 1 shows the amplification curves for different mutations tested in Sample S2

491

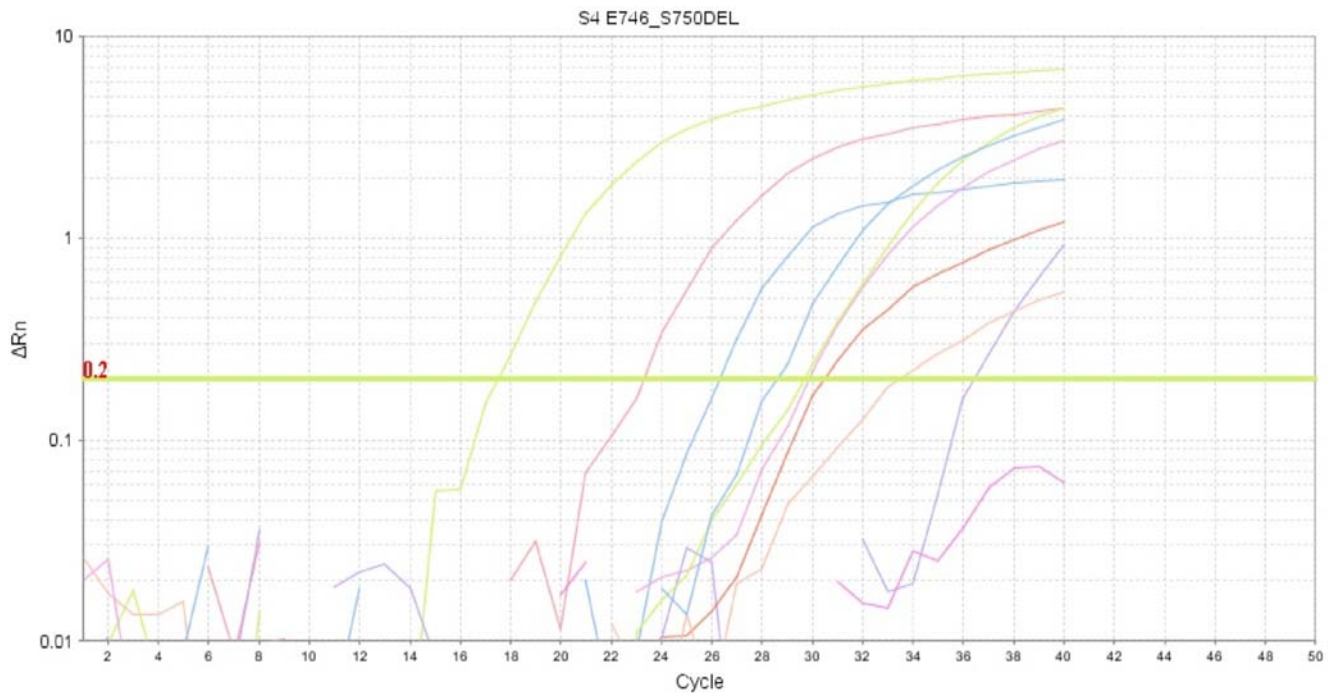

Supplemental figure 2 shows the amplification curves for different mutations tested in Sample S4

492

493

494

495

496

497

498

499

500

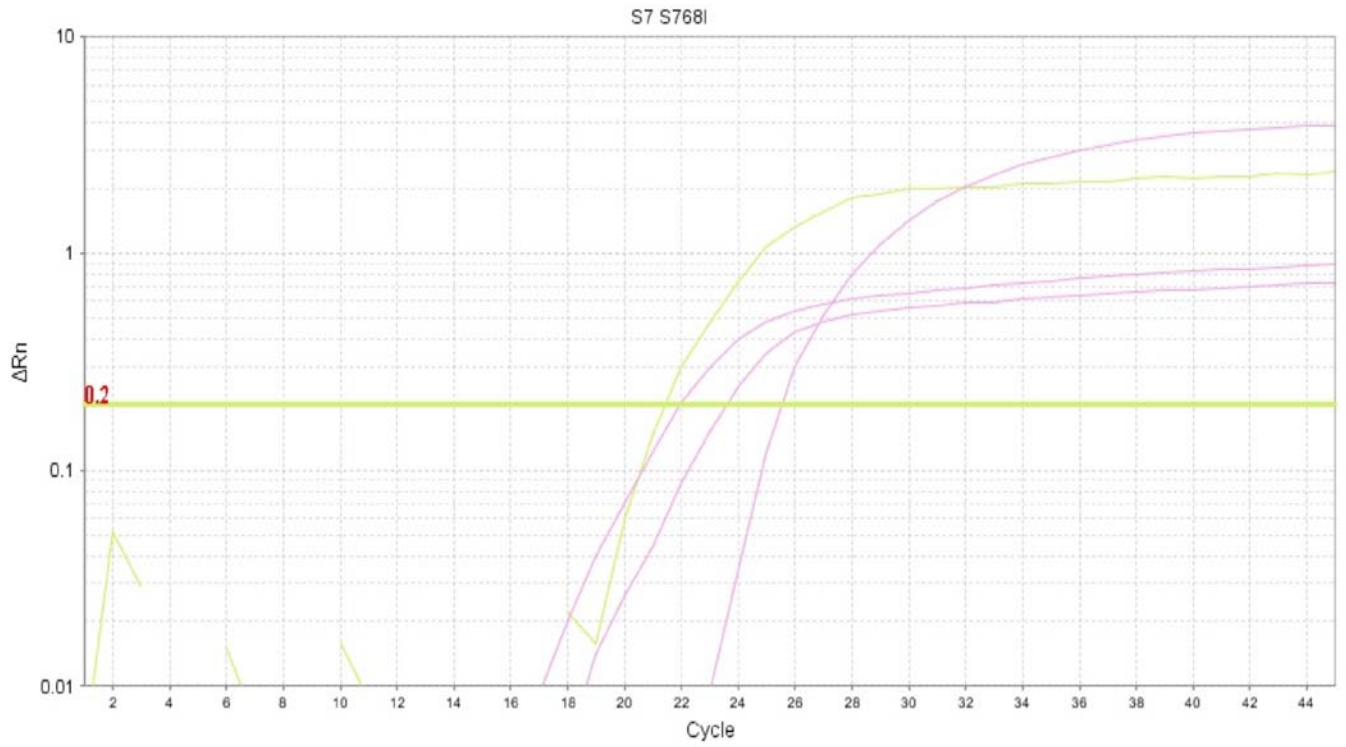

**Supplemental figure 3 shows the amplification curves for different mutations tested in Sample S7**

501

502

503

504

505

506

507



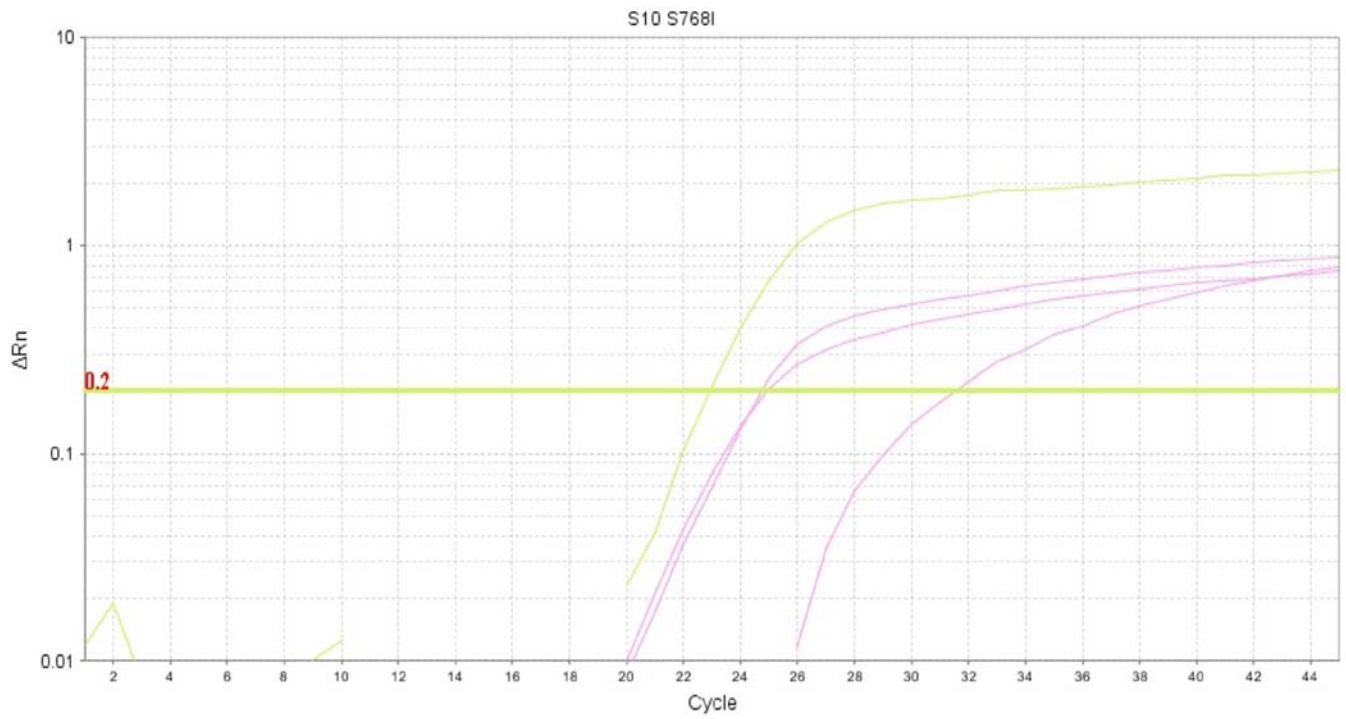

Supplemental figure 5 shows the amplification curves for different mutations tested in Sample S9

508

509

510

511

512

513

514

515

516

517

518

519

520

521

522

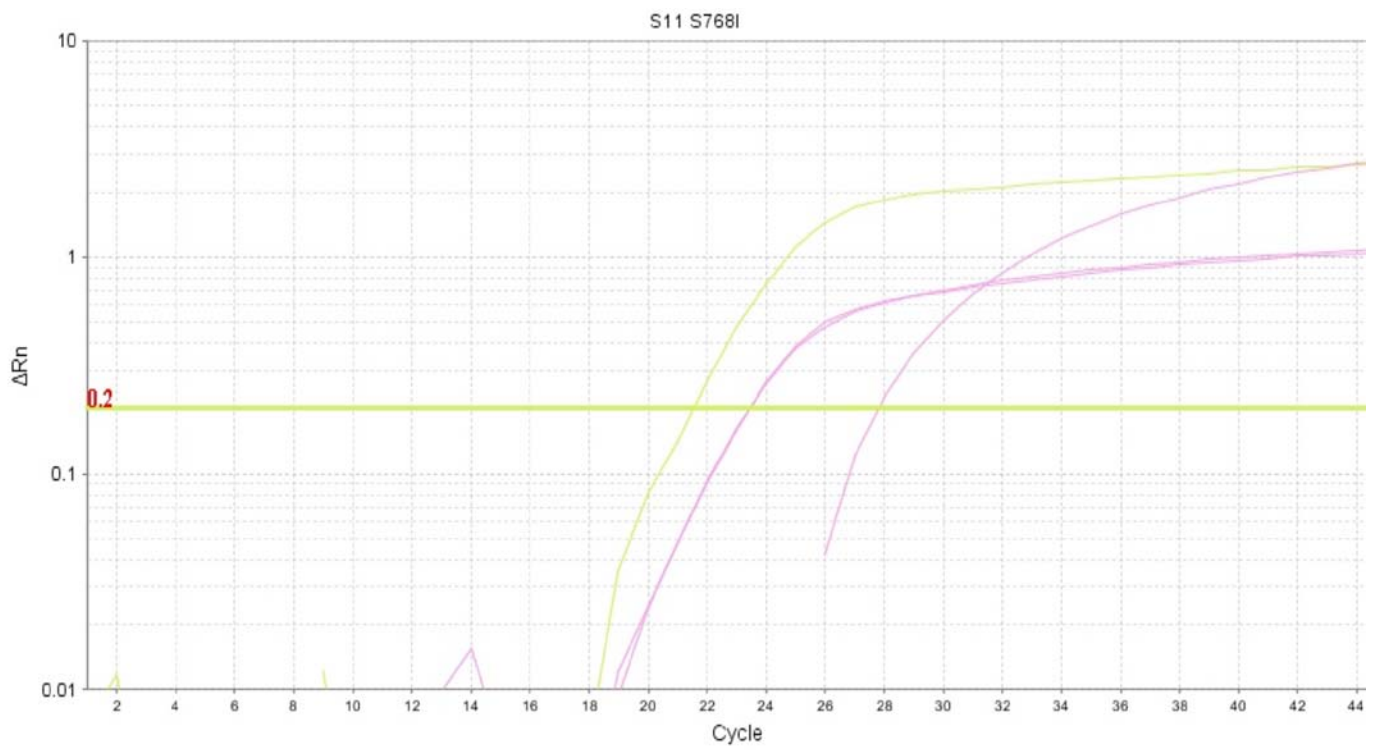

**Supplemental figure 6 shows the amplification curves for different mutations tested in Sample S10**

523

524

525

526

527

528  
529  
530  
531  
532  
533  
534

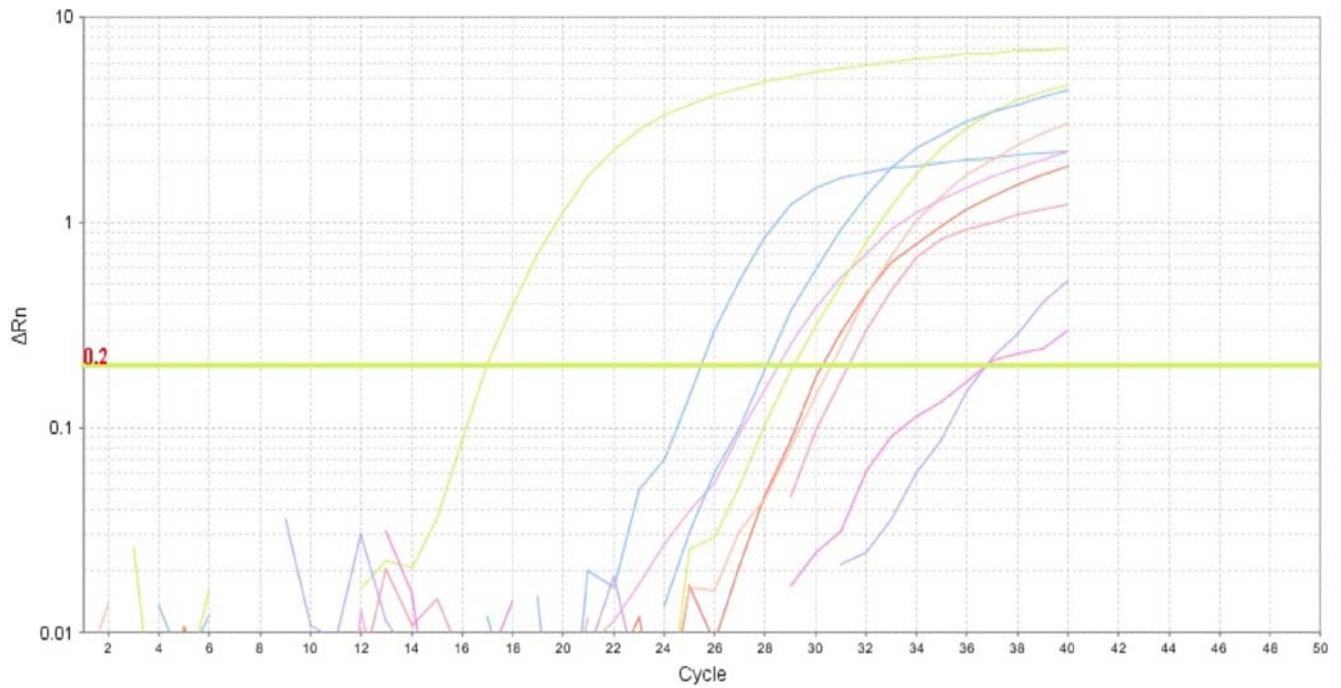

**Supplemental figure 7 shows the representative amplification curves for different mutations tested and classified as a Wild Type sample or below LOD**

535  
536  
537

538

| Sample No. | $\Delta C_t$ |        |        |         |        |        |        |              |         |
|------------|--------------|--------|--------|---------|--------|--------|--------|--------------|---------|
|            | G719X        | T790M  | S768I  | EX20INS | C797S  | L858R  | L861Q  | E746_S750DEL | EX19DEL |
| S1         | 11.261       | 12.919 | 12.393 | 15.518  | 13.704 | 21.527 | 19.990 | 14.589       | 8.697   |
| S2         | 11.595       | 12.284 | 12.148 | 13.915  | 12.470 | 20.835 | ND     | <b>6.327</b> | 9.159   |
| S3         | 10.997       | 12.154 | 11.452 | 13.572  | 13.223 | 19.834 | 19.788 | 14.197       | 8.416   |
| S4         | 10.981       | 12.106 | 12.276 | 15.961  | 12.879 | 18.905 | ND     | <b>5.597</b> | 8.640   |
| S5         | 12.438       | 11.107 | 11.385 | 14.670  | 19.424 | ND     | ND     | ND           | 8.957   |
| S6         | 11.314       | 12.079 | 11.776 | 17.363  | 12.901 | ND     | ND     | 14.173       | 8.642   |

Supplemental table 1 shows the  $\Delta C_t$  values of Samples S1- S6

539

540

541

542

| Sample No. | $\Delta C_t$ |        |              |         |       |       |       |              |         |
|------------|--------------|--------|--------------|---------|-------|-------|-------|--------------|---------|
|            | G719X        | T790M  | S768I        | EX20INS | C797S | L858R | L861Q | E746_S750DEL | EX19DEL |
| S7         | 12.212       | 20.890 | <b>4.077</b> | ND      | ND    | ND    | ND    | ND           | ND      |
| S8         | 15.164       | ND     | 13.393       | ND      | ND    | ND    | ND    | ND           | ND      |
| S9         | 13.942       | ND     | <b>8.558</b> | ND      | ND    | ND    | ND    | ND           | ND      |
| S10        | 12.041       | ND     | <b>6.280</b> | ND      | ND    | ND    | ND    | ND           | ND      |

Supplemental table 2 shows the  $\Delta C_t$  values of Samples S7-S11

543  
544  
545  
546  
547

### Supplementary table 3

548 List of newly designed primers

| Region of Interest | Forward Primer 5' to 3' | Reverse Primer 5' to 3'  |
|--------------------|-------------------------|--------------------------|
| Exon 18            | GTCCTTCCAAATGAGCTGGCAAG | ACAAAGAGTAAAGTAGATGATGG  |
| Exon 19            | TGTCCCTCACCTTCGGGGTGCAT | ACATTTAGGATGTGGAGATGAGCA |
| Exon 20            | CTCAAGATCGCATTTCATGCGTC | GACAGGCACTGATTTGTGCAC    |
| Exon 21            | AGTAGTCACTAACGTTCCGCCAG | TCCCAGCAAGTACTGTTCCC     |

549  
550  
551

552 **Optimization of a polymerase chain reaction protocol to amplify EGFR exon 18, 19, 20 and**  
553 **21 from malignant pleural effusion (MPE).**

554 Initially, we attempted a PCR amplification coupled with a direct sequencing approach to  
555 detect EGFR mutations from malignant pleural effusions. Appropriate primers (sequences listed  
556 in table 1) were designed and optimized on sample S0. Successful amplification of exons 18-21  
557 by PCR on S0 are shown in figure 1. The primers for exon 18 and 21 had 55 °C as the annealing  
558 temperature while exon 19 and 20 were best amplified at an annealing temperature of 57.8 °C.

559

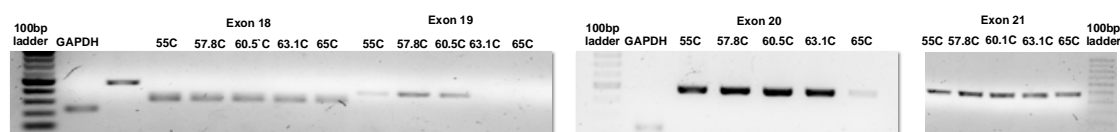

560

561 **Supplementary figure 8:** 1.2% Agarose gel imaged under ultra-violet light: 100bp ladder, A:  
562 GAPDH, B: Exon 20, lanes C-G: Exon 19 at annealing temperatures of 55 C, 57.8 C, 60.5 C,  
563 63.1 C and 65 C lanes H-L: Exon 18 at annealing temperatures of 55 C, 57.8 C, 60.5 C, 63.1 C  
564 and 65 C, lanes M-Q: Exon 21 at annealing temperatures of 55 C, 57.8 C, 60.5 C, 63.1 C and 65  
565 C Interestingly, two distinct bands are visible for Exon 19 (lanes C-G)

566

567

568

569

570

571

572

573 **List of genes with mutations co-occurring with S768I**

574

| Gene      | Cytoband      | (B) EGFR   | (C) S768I  | Alteration Overlap | Log Ratio | p-Value   | q-Value   | Enriched in |
|-----------|---------------|------------|------------|--------------------|-----------|-----------|-----------|-------------|
| PDE1B     | 12q13.2       | 5 (0.70%)  | 6 (35.29%) |                    | -5.66     | 2.58E-08  | 1.823E-04 | (C) S768I   |
| PNLIP     | 10q25.3       | 7 (0.98%)  | 6 (35.29%) |                    | -5.17     | 9.33E-08  | 1.823E-04 | (C) S768I   |
| CTNNA1    | 5q31.2        | 3 (0.42%)  | 5 (29.41%) |                    | -6.13     | 1.94E-07  | 1.823E-04 | (C) S768I   |
| BAG3      | 10q26.11      | 0 (0.00%)  | 4 (23.53%) |                    | <-10      | 2.02E-07  | 1.823E-04 | (C) S768I   |
| CDCA7     | 2q31.1        | 0 (0.00%)  | 4 (23.53%) |                    | <-10      | 2.02E-07  | 1.823E-04 | (C) S768I   |
| DACH2     | Xq21.2        | 0 (0.00%)  | 4 (23.53%) |                    | <-10      | 2.02E-07  | 1.823E-04 | (C) S768I   |
| KCNA7     | 19q13.33      | 0 (0.00%)  | 4 (23.53%) |                    | <-10      | 2.02E-07  | 1.823E-04 | (C) S768I   |
| NKAP      | Xq24          | 0 (0.00%)  | 4 (23.53%) |                    | <-10      | 2.02E-07  | 1.823E-04 | (C) S768I   |
| ODF2      | 9q34.11       | 0 (0.00%)  | 4 (23.53%) |                    | <-10      | 2.02E-07  | 1.823E-04 | (C) S768I   |
| PLSCR2    | 3q24          | 0 (0.00%)  | 4 (23.53%) |                    | <-10      | 2.02E-07  | 1.823E-04 | (C) S768I   |
| RP2       | Xp11.3        | 0 (0.00%)  | 4 (23.53%) |                    | <-10      | 2.02E-07  | 1.823E-04 | (C) S768I   |
| SLC7A2    | 8p22          | 0 (0.00%)  | 4 (23.53%) |                    | <-10      | 2.02E-07  | 1.823E-04 | (C) S768I   |
| TEK3      | 17p12         | 0 (0.00%)  | 4 (23.53%) |                    | <-10      | 2.02E-07  | 1.823E-04 | (C) S768I   |
| TOMM70    | 3q12.2        | 0 (0.00%)  | 4 (23.53%) |                    | <-10      | 2.02E-07  | 1.823E-04 | (C) S768I   |
| TRIM22    | 11p15.4       | 4 (0.56%)  | 5 (29.41%) |                    | -5.71     | 4.3E-07   | 3.627E-04 | (C) S768I   |
| TLR4      | 9q33.1        | 21 (2.94%) | 7 (41.18%) |                    | -3.81     | 8.27E-07  | 5.99E-04  | (C) S768I   |
| C2CD2L    | 11q23.3       | 1 (0.14%)  | 4 (23.53%) |                    | -7.39     | 9.94E-07  | 5.99E-04  | (C) S768I   |
| GTF2IRD1  | 7q11.23       | 1 (0.14%)  | 4 (23.53%) |                    | -7.39     | 9.94E-07  | 5.99E-04  | (C) S768I   |
| HIST2H2AB | 1q21.2        | 1 (0.14%)  | 4 (23.53%) |                    | -7.39     | 9.94E-07  | 5.99E-04  | (C) S768I   |
| PHC3      | 3q26.2        | 1 (0.14%)  | 4 (23.53%) |                    | -7.39     | 9.94E-07  | 5.99E-04  | (C) S768I   |
| ZNF304    | 19q13.43      | 1 (0.14%)  | 4 (23.53%) |                    | -7.39     | 9.94E-07  | 5.99E-04  | (C) S768I   |
| ATRX      | Xq21.1        | 38 (5.65%) | 8 (50.00%) |                    | -3.15     | 1.847E-06 | 1.062E-03 | (C) S768I   |
| CCR6      | 6q27          | 2 (0.28%)  | 4 (23.53%) |                    | -6.39     | 2.939E-06 | 1.329E-03 | (C) S768I   |
| FCMR      | 1q32.1        | 2 (0.28%)  | 4 (23.53%) |                    | -6.39     | 2.939E-06 | 1.329E-03 | (C) S768I   |
| SMCR8     | 17p11.2       | 2 (0.28%)  | 4 (23.53%) |                    | -6.39     | 2.939E-06 | 1.329E-03 | (C) S768I   |
| TNPO2     | 19p13.13      | 2 (0.28%)  | 4 (23.53%) |                    | -6.39     | 2.939E-06 | 1.329E-03 | (C) S768I   |
| ZBTB10    | 8q21.13       | 2 (0.28%)  | 4 (23.53%) |                    | -6.39     | 2.939E-06 | 1.329E-03 | (C) S768I   |
| ZNF428    | 19q13.31      | 2 (0.28%)  | 4 (23.53%) |                    | -6.39     | 2.939E-06 | 1.329E-03 | (C) S768I   |
| FRMPD4    | Xp22.2        | 8 (1.12%)  | 5 (29.41%) |                    | -4.71     | 4.153E-06 | 1.812E-03 | (C) S768I   |
| CA1       | 8q21.2        | 3 (0.42%)  | 4 (23.53%) |                    | -5.81     | 6.76E-06  | 2.413E-03 | (C) S768I   |
| NRIP1     | 21q11.2-q21.1 | 3 (0.42%)  | 4 (23.53%) |                    | -5.81     | 6.76E-06  | 2.413E-03 | (C) S768I   |
| TMPRSS11D | 4q13.2        | 3 (0.42%)  | 4 (23.53%) |                    | -5.81     | 6.76E-06  | 2.413E-03 | (C) S768I   |
| PPM1D     | 17q23.2       | 3 (0.51%)  | 4 (26.67%) |                    | -5.70     | 8.603E-06 | 2.413E-03 | (C) S768I   |
| ASB10     | 7q36.1        | 0 (0.00%)  | 3 (17.65%) |                    | <-10      | 1.049E-05 | 2.413E-03 | (C) S768I   |
| BEST3     | 12q15         | 0 (0.00%)  | 3 (17.65%) |                    | <-10      | 1.049E-05 | 2.413E-03 | (C) S768I   |
| CEP44     | 4q34.1        | 0 (0.00%)  | 3 (17.65%) |                    | <-10      | 1.049E-05 | 2.413E-03 | (C) S768I   |
| CPT1A     | 11q13.3       | 0 (0.00%)  | 3 (17.65%) |                    | <-10      | 1.049E-05 | 2.413E-03 | (C) S768I   |
| ENTPD7    | 10q24.2       | 0 (0.00%)  | 3 (17.65%) |                    | <-10      | 1.049E-05 | 2.413E-03 | (C) S768I   |

|          |                |            |            |  |       |           |           |           |
|----------|----------------|------------|------------|--|-------|-----------|-----------|-----------|
| EPDR1    | 7p14.1         | 0 (0.00%)  | 3 (17.65%) |  | <-10  | 1.049E-05 | 2.413E-03 | (C) S768I |
| FOXL1    | 16q24.1        | 0 (0.00%)  | 3 (17.65%) |  | <-10  | 1.049E-05 | 2.413E-03 | (C) S768I |
| GGNBP2   | 17q12          | 0 (0.00%)  | 3 (17.65%) |  | <-10  | 1.049E-05 | 2.413E-03 | (C) S768I |
| IFNLR1   | 1p36.11        | 0 (0.00%)  | 3 (17.65%) |  | <-10  | 1.049E-05 | 2.413E-03 | (C) S768I |
| KCNJ6    | 21q22.13       | 0 (0.00%)  | 3 (17.65%) |  | <-10  | 1.049E-05 | 2.413E-03 | (C) S768I |
| KRT3     | 12q13.13       | 0 (0.00%)  | 3 (17.65%) |  | <-10  | 1.049E-05 | 2.413E-03 | (C) S768I |
| MIOS     | 7p21.3         | 0 (0.00%)  | 3 (17.65%) |  | <-10  | 1.049E-05 | 2.413E-03 | (C) S768I |
| MOGAT2   | 11q13.5        | 0 (0.00%)  | 3 (17.65%) |  | <-10  | 1.049E-05 | 2.413E-03 | (C) S768I |
| OR6C2    | 12q13.2        | 0 (0.00%)  | 3 (17.65%) |  | <-10  | 1.049E-05 | 2.413E-03 | (C) S768I |
| PARVA    | 11p15.3        | 0 (0.00%)  | 3 (17.65%) |  | <-10  | 1.049E-05 | 2.413E-03 | (C) S768I |
| PPP2R5A  | 1q32.3         | 0 (0.00%)  | 3 (17.65%) |  | <-10  | 1.049E-05 | 2.413E-03 | (C) S768I |
| PSMD7    | 16q23.1        | 0 (0.00%)  | 3 (17.65%) |  | <-10  | 1.049E-05 | 2.413E-03 | (C) S768I |
| SIRPD    | 20p13          | 0 (0.00%)  | 3 (17.65%) |  | <-10  | 1.049E-05 | 2.413E-03 | (C) S768I |
| SKIV2L   | 6p21.33        | 0 (0.00%)  | 3 (17.65%) |  | <-10  | 1.049E-05 | 2.413E-03 | (C) S768I |
| WDR3     | 1p12           | 0 (0.00%)  | 3 (17.65%) |  | <-10  | 1.049E-05 | 2.413E-03 | (C) S768I |
| ZNF474   | 5q23.2         | 0 (0.00%)  | 3 (17.65%) |  | <-10  | 1.049E-05 | 2.413E-03 | (C) S768I |
| ZNF720   | 16p11.2        | 0 (0.00%)  | 3 (17.65%) |  | <-10  | 1.049E-05 | 2.413E-03 | (C) S768I |
| ETNPPL   | 4q25           | 4 (0.56%)  | 4 (23.53%) |  | -5.39 | 1.333E-05 | 2.635E-03 | (C) S768I |
| GPR34    | Xp11.4         | 4 (0.56%)  | 4 (23.53%) |  | -5.39 | 1.333E-05 | 2.635E-03 | (C) S768I |
| GTPBP1   | 22q13.1        | 4 (0.56%)  | 4 (23.53%) |  | -5.39 | 1.333E-05 | 2.635E-03 | (C) S768I |
| PARP8    | 5q11.1         | 4 (0.56%)  | 4 (23.53%) |  | -5.39 | 1.333E-05 | 2.635E-03 | (C) S768I |
| SLTM     | 15q22.1        | 4 (0.56%)  | 4 (23.53%) |  | -5.39 | 1.333E-05 | 2.635E-03 | (C) S768I |
| SPOCD1   | 1p35.2         | 4 (0.56%)  | 4 (23.53%) |  | -5.39 | 1.333E-05 | 2.635E-03 | (C) S768I |
| TEX11    | Xq13.1         | 4 (0.56%)  | 4 (23.53%) |  | -5.39 | 1.333E-05 | 2.635E-03 | (C) S768I |
| TMEM246  | 9q31.1         | 4 (0.56%)  | 4 (23.53%) |  | -5.39 | 1.333E-05 | 2.635E-03 | (C) S768I |
| ZGPAT    | 20q13.33       | 4 (0.56%)  | 4 (23.53%) |  | -5.39 | 1.333E-05 | 2.635E-03 | (C) S768I |
| ARHGAP10 | 4q31.23        | 5 (0.70%)  | 4 (23.53%) |  | -5.07 | 2.364E-05 | 4.4E-03   | (C) S768I |
| CD5      | 11q12.2        | 5 (0.70%)  | 4 (23.53%) |  | -5.07 | 2.364E-05 | 4.4E-03   | (C) S768I |
| CEP85L   | 6q22.31        | 5 (0.70%)  | 4 (23.53%) |  | -5.07 | 2.364E-05 | 4.4E-03   | (C) S768I |
| MTHFD1   | 14q23.3        | 5 (0.70%)  | 4 (23.53%) |  | -5.07 | 2.364E-05 | 4.4E-03   | (C) S768I |
| FLG      | 1q21.3         | 40 (5.60%) | 7 (41.18%) |  | -2.88 | 3.463E-05 | 5.946E-03 | (C) S768I |
| DNMT3A   | 2p23.3         | 6 (0.89%)  | 4 (25.00%) |  | -4.81 | 3.772E-05 | 5.946E-03 | (C) S768I |
| ACOX3    | 4p16.1         | 6 (0.84%)  | 4 (23.53%) |  | -4.81 | 3.884E-05 | 5.946E-03 | (C) S768I |
| DNAH6    | 2p11.2         | 6 (0.84%)  | 4 (23.53%) |  | -4.81 | 3.884E-05 | 5.946E-03 | (C) S768I |
| GSTA1    | 6p12.2         | 6 (0.84%)  | 4 (23.53%) |  | -4.81 | 3.884E-05 | 5.946E-03 | (C) S768I |
| KAT6B    | 10q22.2        | 6 (0.84%)  | 4 (23.53%) |  | -4.81 | 3.884E-05 | 5.946E-03 | (C) S768I |
| NCOA7    | 6q22.31-q22.32 | 6 (0.84%)  | 4 (23.53%) |  | -4.81 | 3.884E-05 | 5.946E-03 | (C) S768I |
| PLCB3    | 11q13.1        | 6 (0.84%)  | 4 (23.53%) |  | -4.81 | 3.884E-05 | 5.946E-03 | (C) S768I |
| RNF6     | 13q12.13       | 6 (0.84%)  | 4 (23.53%) |  | -4.81 | 3.884E-05 | 5.946E-03 | (C) S768I |
| SERPINA7 | Xq22.3         | 6 (0.84%)  | 4 (23.53%) |  | -4.81 | 3.884E-05 | 5.946E-03 | (C) S768I |



|                 |          |            |            |  |       |           |           |           |
|-----------------|----------|------------|------------|--|-------|-----------|-----------|-----------|
| <b>TUBGCP6</b>  | 22q13.33 | 6 (0.84%)  | 4 (23.53%) |  | -4.81 | 3.884E-05 | 5.946E-03 | (C) S768I |
| <b>C6ORF136</b> | 6p21.33  | 1 (0.14%)  | 3 (17.65%) |  | -6.98 | 4.135E-05 | 5.946E-03 | (C) S768I |
| <b>CIZ1</b>     | 9q34.11  | 1 (0.14%)  | 3 (17.65%) |  | -6.98 | 4.135E-05 | 5.946E-03 | (C) S768I |
| <b>DNA2</b>     | 10q21.3  | 1 (0.14%)  | 3 (17.65%) |  | -6.98 | 4.135E-05 | 5.946E-03 | (C) S768I |
| <b>H6PD</b>     | 1p36.22  | 1 (0.14%)  | 3 (17.65%) |  | -6.98 | 4.135E-05 | 5.946E-03 | (C) S768I |
| <b>LRIG1</b>    | 3p14.1   | 1 (0.14%)  | 3 (17.65%) |  | -6.98 | 4.135E-05 | 5.946E-03 | (C) S768I |
| <b>LUZP4</b>    | Xq23     | 1 (0.14%)  | 3 (17.65%) |  | -6.98 | 4.135E-05 | 5.946E-03 | (C) S768I |
| <b>MTMR14</b>   | 3p25.3   | 1 (0.14%)  | 3 (17.65%) |  | -6.98 | 4.135E-05 | 5.946E-03 | (C) S768I |
| <b>RAB3C</b>    | 5q11.2   | 1 (0.14%)  | 3 (17.65%) |  | -6.98 | 4.135E-05 | 5.946E-03 | (C) S768I |
| <b>SYT3</b>     | 19q13.33 | 1 (0.14%)  | 3 (17.65%) |  | -6.98 | 4.135E-05 | 5.946E-03 | (C) S768I |
| <b>FSHR</b>     | 2p16.3   | 15 (2.10%) | 5 (29.41%) |  | -3.81 | 4.536E-05 | 6.45E-03  | (C) S768I |
| <b>ADAM8</b>    | 10q26.3  | 8 (1.12%)  | 4 (23.53%) |  | -4.39 | 8.895E-05 | 0.0122    | (C) S768I |
| <b>GPR52</b>    | 1q25.1   | 8 (1.12%)  | 4 (23.53%) |  | -4.39 | 8.895E-05 | 0.0122    | (C) S768I |
| <b>MYO16</b>    | 13q33.3  | 8 (1.12%)  | 4 (23.53%) |  | -4.39 | 8.895E-05 | 0.0122    | (C) S768I |
| <b>ANAPC7</b>   | 12q24.11 | 2 (0.28%)  | 3 (17.65%) |  | -5.98 | 1.019E-04 | 0.0126    | (C) S768I |
| <b>CARD14</b>   | 17q25.3  | 2 (0.28%)  | 3 (17.65%) |  | -5.98 | 1.019E-04 | 0.0126    | (C) S768I |
| <b>CH25H</b>    | 10q23.31 | 2 (0.28%)  | 3 (17.65%) |  | -5.98 | 1.019E-04 | 0.0126    | (C) S768I |
| <b>FFAR1</b>    | 19q13.12 | 2 (0.28%)  | 3 (17.65%) |  | -5.98 | 1.019E-04 | 0.0126    | (C) S768I |
| <b>GADD45A</b>  | 1p31.3   | 2 (0.28%)  | 3 (17.65%) |  | -5.98 | 1.019E-04 | 0.0126    | (C) S768I |
| <b>MEIS3</b>    | 19q13.32 | 2 (0.28%)  | 3 (17.65%) |  | -5.98 | 1.019E-04 | 0.0126    | (C) S768I |
| <b>OR2M7</b>    | 1q44     | 2 (0.28%)  | 3 (17.65%) |  | -5.98 | 1.019E-04 | 0.0126    | (C) S768I |
| <b>TBC1D9B</b>  | 5q35.3   | 2 (0.28%)  | 3 (17.65%) |  | -5.98 | 1.019E-04 | 0.0126    | (C) S768I |
| <b>TSNARE1</b>  | 8q24.3   | 2 (0.28%)  | 3 (17.65%) |  | -5.98 | 1.019E-04 | 0.0126    | (C) S768I |
| <b>USP9X</b>    | Xp11.4   | 2 (0.28%)  | 3 (17.65%) |  | -5.98 | 1.019E-04 | 0.0126    | (C) S768I |
| <b>A2ML1</b>    | 12p13.31 | 9 (1.26%)  | 4 (23.53%) |  | -4.22 | 1.266E-04 | 0.0151    | (C) S768I |
| <b>MCOLN3</b>   | 1p22.3   | 9 (1.26%)  | 4 (23.53%) |  | -4.22 | 1.266E-04 | 0.0151    | (C) S768I |
| <b>PCDHA6</b>   | 5q31.3   | 9 (1.26%)  | 4 (23.53%) |  | -4.22 | 1.266E-04 | 0.0151    | (C) S768I |
| <b>RAG1</b>     | 11p12    | 9 (1.26%)  | 4 (23.53%) |  | -4.22 | 1.266E-04 | 0.0151    | (C) S768I |
| <b>NAALAD2</b>  | 11q14.3  | 10 (1.40%) | 4 (23.53%) |  | -4.07 | 1.747E-04 | 0.0201    | (C) S768I |
| <b>NME8</b>     | 7p14.1   | 10 (1.40%) | 4 (23.53%) |  | -4.07 | 1.747E-04 | 0.0201    | (C) S768I |
| <b>PKD1</b>     | 16p13.3  | 10 (1.40%) | 4 (23.53%) |  | -4.07 | 1.747E-04 | 0.0201    | (C) S768I |
| <b>TEX10</b>    | 9q31.1   | 10 (1.40%) | 4 (23.53%) |  | -4.07 | 1.747E-04 | 0.0201    | (C) S768I |
| <b>C11ORF88</b> | 11q23.1  | 3 (0.42%)  | 3 (17.65%) |  | -5.39 | 2.008E-04 | 0.0210    | (C) S768I |
| <b>CASZ1</b>    | 1p36.22  | 3 (0.42%)  | 3 (17.65%) |  | -5.39 | 2.008E-04 | 0.0210    | (C) S768I |
| <b>DMWD</b>     | 19q13.32 | 3 (0.42%)  | 3 (17.65%) |  | -5.39 | 2.008E-04 | 0.0210    | (C) S768I |
| <b>DPYSL4</b>   | 10q26.3  | 3 (0.42%)  | 3 (17.65%) |  | -5.39 | 2.008E-04 | 0.0210    | (C) S768I |
| <b>GABRG3</b>   | 15q12    | 3 (0.42%)  | 3 (17.65%) |  | -5.39 | 2.008E-04 | 0.0210    | (C) S768I |
| <b>GALNT15</b>  | 3p25.1   | 3 (0.42%)  | 3 (17.65%) |  | -5.39 | 2.008E-04 | 0.0210    | (C) S768I |
| <b>GZMA</b>     | 5q11.2   | 3 (0.42%)  | 3 (17.65%) |  | -5.39 | 2.008E-04 | 0.0210    | (C) S768I |
| <b>LDHA</b>     | 11p15.1  | 3 (0.42%)  | 3 (17.65%) |  | -5.39 | 2.008E-04 | 0.0210    | (C) S768I |

|           |          |            |            |  |       |           |        |           |
|-----------|----------|------------|------------|--|-------|-----------|--------|-----------|
| OPRL1     | 20q13.33 | 3 (0.42%)  | 3 (17.65%) |  | -5.39 | 2.008E-04 | 0.0210 | (C) S768I |
| PCSK6     | 15q26.3  | 3 (0.42%)  | 3 (17.65%) |  | -5.39 | 2.008E-04 | 0.0210 | (C) S768I |
| SMC1B     | 22q13.31 | 3 (0.42%)  | 3 (17.65%) |  | -5.39 | 2.008E-04 | 0.0210 | (C) S768I |
| CDK17     | 12q23.1  | 2 (0.52%)  | 3 (25.00%) |  | -5.59 | 2.053E-04 | 0.0213 | (C) S768I |
| FGF4      | 11q13.3  | 3 (0.43%)  | 3 (17.65%) |  | -5.37 | 2.109E-04 | 0.0217 | (C) S768I |
| ADGRL1    | 19p13.12 | 11 (1.54%) | 4 (23.53%) |  | -3.93 | 2.349E-04 | 0.0238 | (C) S768I |
| MED13     | 17q23.2  | 11 (1.54%) | 4 (23.53%) |  | -3.93 | 2.349E-04 | 0.0238 | (C) S768I |
| MUC17     | 7q22.1   | 56 (7.84%) | 7 (41.18%) |  | -2.39 | 2.483E-04 | 0.0249 | (C) S768I |
| ITGA8     | 10p13    | 24 (3.36%) | 5 (29.41%) |  | -3.13 | 3.061E-04 | 0.0305 | (C) S768I |
| UHRF1BP1L | 12q23.1  | 12 (1.68%) | 4 (23.53%) |  | -3.81 | 3.086E-04 | 0.0305 | (C) S768I |
| ADGRF2    | 6p12.3   | 4 (0.56%)  | 3 (17.65%) |  | -4.98 | 3.464E-04 | 0.0311 | (C) S768I |
| AKR7A3    | 1p36.13  | 4 (0.56%)  | 3 (17.65%) |  | -4.98 | 3.464E-04 | 0.0311 | (C) S768I |
| CEP89     | 19q13.11 | 4 (0.56%)  | 3 (17.65%) |  | -4.98 | 3.464E-04 | 0.0311 | (C) S768I |
| COL23A1   | 5q35.3   | 4 (0.56%)  | 3 (17.65%) |  | -4.98 | 3.464E-04 | 0.0311 | (C) S768I |
| CSF2RB    | 22q12.3  | 4 (0.56%)  | 3 (17.65%) |  | -4.98 | 3.464E-04 | 0.0311 | (C) S768I |
| ELP4      | 11p13    | 4 (0.56%)  | 3 (17.65%) |  | -4.98 | 3.464E-04 | 0.0311 | (C) S768I |
| MMEL1     | 1p36.32  | 4 (0.56%)  | 3 (17.65%) |  | -4.98 | 3.464E-04 | 0.0311 | (C) S768I |
| NKTR      | 3p22.1   | 4 (0.56%)  | 3 (17.65%) |  | -4.98 | 3.464E-04 | 0.0311 | (C) S768I |
| OR2M4     | 1q44     | 4 (0.56%)  | 3 (17.65%) |  | -4.98 | 3.464E-04 | 0.0311 | (C) S768I |
| PARM1     | 4q13.3   | 4 (0.56%)  | 3 (17.65%) |  | -4.98 | 3.464E-04 | 0.0311 | (C) S768I |
| TNNT3     | 11p15.5  | 4 (0.56%)  | 3 (17.65%) |  | -4.98 | 3.464E-04 | 0.0311 | (C) S768I |
| VGLL1     | Xq26.3   | 4 (0.56%)  | 3 (17.65%) |  | -4.98 | 3.464E-04 | 0.0311 | (C) S768I |
| ZNF226    | 19q13.31 | 4 (0.56%)  | 3 (17.65%) |  | -4.98 | 3.464E-04 | 0.0311 | (C) S768I |
| ABCB4     | 7q21.12  | 13 (1.82%) | 4 (23.53%) |  | -3.69 | 3.978E-04 | 0.0355 | (C) S768I |
| ACE       | 17q23.3  | 14 (1.96%) | 4 (23.53%) |  | -3.58 | 5.041E-04 | 0.0398 | (C) S768I |
| DSG2      | 18q12.1  | 14 (1.96%) | 4 (23.53%) |  | -3.58 | 5.041E-04 | 0.0398 | (C) S768I |
| TTC14     | 3q26.33  | 14 (1.96%) | 4 (23.53%) |  | -3.58 | 5.041E-04 | 0.0398 | (C) S768I |
| C7ORF31   | 7p15.3   | 0 (0.00%)  | 2 (11.76%) |  | <-10  | 5.097E-04 | 0.0398 | (C) S768I |
| CC2D2A    | 4p15.32  | 0 (0.00%)  | 2 (11.76%) |  | <-10  | 5.097E-04 | 0.0398 | (C) S768I |
| EHD2      | 19q13.33 | 0 (0.00%)  | 2 (11.76%) |  | <-10  | 5.097E-04 | 0.0398 | (C) S768I |
| EYA1      | 8q13.3   | 0 (0.00%)  | 2 (11.76%) |  | <-10  | 5.097E-04 | 0.0398 | (C) S768I |
| FAM193B   | 5q35.3   | 0 (0.00%)  | 2 (11.76%) |  | <-10  | 5.097E-04 | 0.0398 | (C) S768I |
| FIBP      | 11q13.1  | 0 (0.00%)  | 2 (11.76%) |  | <-10  | 5.097E-04 | 0.0398 | (C) S768I |
| GYG2      | Xp22.33  | 0 (0.00%)  | 2 (11.76%) |  | <-10  | 5.097E-04 | 0.0398 | (C) S768I |
| HYKK      | 15q25.1  | 0 (0.00%)  | 2 (11.76%) |  | <-10  | 5.097E-04 | 0.0398 | (C) S768I |
| KLK13     | 19q13.41 | 0 (0.00%)  | 2 (11.76%) |  | <-10  | 5.097E-04 | 0.0398 | (C) S768I |
| LMAN2L    | 2q11.2   | 0 (0.00%)  | 2 (11.76%) |  | <-10  | 5.097E-04 | 0.0398 | (C) S768I |
| OR5AN1    | 11q12.1  | 0 (0.00%)  | 2 (11.76%) |  | <-10  | 5.097E-04 | 0.0398 | (C) S768I |
| SPANXN3   | Xq27.3   | 0 (0.00%)  | 2 (11.76%) |  | <-10  | 5.097E-04 | 0.0398 | (C) S768I |
| TMEM161A  | 19p13.11 | 0 (0.00%)  | 2 (11.76%) |  | <-10  | 5.097E-04 | 0.0398 | (C) S768I |

|                |          |            |            |  |       |           |        |           |
|----------------|----------|------------|------------|--|-------|-----------|--------|-----------|
| <b>TRMT1</b>   | 19p13.13 | 0 (0.00%)  | 2 (11.76%) |  | <-10  | 5.097E-04 | 0.0398 | (C) S768I |
| <b>TSPAN31</b> | 12q14.1  | 0 (0.00%)  | 2 (11.76%) |  | <-10  | 5.097E-04 | 0.0398 | (C) S768I |
| <b>TUBA3D</b>  | 2q21.1   | 0 (0.00%)  | 2 (11.76%) |  | <-10  | 5.097E-04 | 0.0398 | (C) S768I |
| <b>ZNF829</b>  | 19q13.12 | 0 (0.00%)  | 2 (11.76%) |  | <-10  | 5.097E-04 | 0.0398 | (C) S768I |
| <b>ADAM2</b>   | 8p11.22  | 5 (0.70%)  | 3 (17.65%) |  | -4.66 | 5.462E-04 | 0.0400 | (C) S768I |
| <b>CPA4</b>    | 7q32.2   | 5 (0.70%)  | 3 (17.65%) |  | -4.66 | 5.462E-04 | 0.0400 | (C) S768I |
| <b>CTTNBP2</b> | 7q31.31  | 5 (0.70%)  | 3 (17.65%) |  | -4.66 | 5.462E-04 | 0.0400 | (C) S768I |
| <b>DUSP19</b>  | 2q32.1   | 5 (0.70%)  | 3 (17.65%) |  | -4.66 | 5.462E-04 | 0.0400 | (C) S768I |
| <b>ELL2</b>    | 5q15     | 5 (0.70%)  | 3 (17.65%) |  | -4.66 | 5.462E-04 | 0.0400 | (C) S768I |
| <b>GPR141</b>  | 7p14.1   | 5 (0.70%)  | 3 (17.65%) |  | -4.66 | 5.462E-04 | 0.0400 | (C) S768I |
| <b>ITGB4</b>   | 17q25.1  | 5 (0.70%)  | 3 (17.65%) |  | -4.66 | 5.462E-04 | 0.0400 | (C) S768I |
| <b>KCTD19</b>  | 16q22.1  | 5 (0.70%)  | 3 (17.65%) |  | -4.66 | 5.462E-04 | 0.0400 | (C) S768I |
| <b>SNX13</b>   | 7p21.1   | 5 (0.70%)  | 3 (17.65%) |  | -4.66 | 5.462E-04 | 0.0400 | (C) S768I |
| <b>TSGA10</b>  | 2q11.2   | 5 (0.70%)  | 3 (17.65%) |  | -4.66 | 5.462E-04 | 0.0400 | (C) S768I |
| <b>TULP1</b>   | 6p21.31  | 5 (0.70%)  | 3 (17.65%) |  | -4.66 | 5.462E-04 | 0.0400 | (C) S768I |
| <b>GLI2</b>    | 2q14.2   | 15 (2.10%) | 4 (23.53%) |  | -3.49 | 6.293E-04 | 0.0455 | (C) S768I |
| <b>GRM1</b>    | 6q24.3   | 15 (2.10%) | 4 (23.53%) |  | -3.49 | 6.293E-04 | 0.0455 | (C) S768I |
